# Supplementary material for: Implementing online consultations in primary care: a mixed-method evaluation extending normalisation process theory through service co-production
Source: PubMed Central journal article supplement (PMC5875620; doi:10.1136/bmjopen-2017-019966), 2018-03-19
Supplement: bmjopen-2017-019966.draft_revisions.pdf [file bmjopen-2017-019966.draft_revisions.pdf]

# BMJ Open

BMJ Open is committed to open peer review. As part of this commitment we make the peer review history of every article we publish publicly available.

When an article is published we post the peer reviewers' comments and the authors' responses online. We also post the versions of the paper that were used during peer review. These are the versions that the peer review comments apply to.

The versions of the paper that follow are the versions that were submitted during the peer review process. They are not the versions of record or the final published versions. They should not be cited or distributed as the published version of this manuscript.

BMJ Open is an open access journal and the full, final, typeset and author-corrected version of record of the manuscript is available on our site with no access controls, subscription charges or pay-per-view fees (<http://bmjopen.bmj.com>).

If you have any questions on BMJ Open's open peer review process please email [editorial.bmjopen@bmj.com](mailto:editorial.bmjopen@bmj.com)

# BMJ Open

## Implementing online consultations in primary care: A mixed method evaluation extending normalisation process theory through service co-production

|                                 |                                                                                                                                                                                                                                                                                                                                                                                                                                                                                                                                                                                                                                                                                                                                                                                                                                                                                                                                                                                                                                                             |
|---------------------------------|-------------------------------------------------------------------------------------------------------------------------------------------------------------------------------------------------------------------------------------------------------------------------------------------------------------------------------------------------------------------------------------------------------------------------------------------------------------------------------------------------------------------------------------------------------------------------------------------------------------------------------------------------------------------------------------------------------------------------------------------------------------------------------------------------------------------------------------------------------------------------------------------------------------------------------------------------------------------------------------------------------------------------------------------------------------|
| Journal:                        | <i>BMJ Open</i>                                                                                                                                                                                                                                                                                                                                                                                                                                                                                                                                                                                                                                                                                                                                                                                                                                                                                                                                                                                                                                             |
| Manuscript ID                   | bmjopen-2017-019966                                                                                                                                                                                                                                                                                                                                                                                                                                                                                                                                                                                                                                                                                                                                                                                                                                                                                                                                                                                                                                         |
| Article Type:                   | Research                                                                                                                                                                                                                                                                                                                                                                                                                                                                                                                                                                                                                                                                                                                                                                                                                                                                                                                                                                                                                                                    |
| Date Submitted by the Author:   | 09-Oct-2017                                                                                                                                                                                                                                                                                                                                                                                                                                                                                                                                                                                                                                                                                                                                                                                                                                                                                                                                                                                                                                                 |
| Complete List of Authors:       | Farr, Michelle; University of Bristol, Population Health Sciences, Bristol Medical School; NIHR CLAHRC West, University Hospitals Bristol NHS Foundation Trust, 9th Floor, Whitefriars, Lewins Mead<br>Banks, Jonathan; University of Bristol, Population Health Sciences, Bristol Medical School; NIHR CLAHRC West, , University Hospitals Bristol NHS Foundation Trust<br>Edwards, Hannah; University of Bristol, Population Health Sciences, Bristol Medical School; NIHR CLAHRC West, University Hospitals Bristol NHS Foundation Trust<br>Northstone, Kate; University of Bristol, Population Health Sciences, Bristol Medical School; ALSPAC, University of Bristol<br>Bernard, Elly; One Care (BNSSG) Ltd<br>Salisbury, Chris; University of Bristol, Population Health Sciences, Bristol Medical School; NIHR CLAHRC West, University Hospitals Bristol NHS Foundation Trust<br>Horwood, Jeremy; University of Bristol, UK, Population Health Sciences, Bristol Medical School; NIHR CLAHRC West, University Hospitals Bristol NHS Foundation Trust |
| <b>Primary Subject Heading</b>: | General practice / Family practice                                                                                                                                                                                                                                                                                                                                                                                                                                                                                                                                                                                                                                                                                                                                                                                                                                                                                                                                                                                                                          |
| Secondary Subject Heading:      | Health informatics                                                                                                                                                                                                                                                                                                                                                                                                                                                                                                                                                                                                                                                                                                                                                                                                                                                                                                                                                                                                                                          |
| Keywords:                       | Co-production, Telemedicine < BIOTECHNOLOGY & BIOINFORMATICS, PRIMARY CARE, normalisation process theory, online consultations, touchpoints                                                                                                                                                                                                                                                                                                                                                                                                                                                                                                                                                                                                                                                                                                                                                                                                                                                                                                                 |
|                                 |                                                                                                                                                                                                                                                                                                                                                                                                                                                                                                                                                                                                                                                                                                                                                                                                                                                                                                                                                                                                                                                             |

SCHOLARONE™  
Manuscripts

# Implementing online consultations in primary care: A mixed method evaluation extending normalisation process theory through service co-production

## Research article

### Authors

Michelle Farr<sup>1,2</sup> [M.Farr@bristol.ac.uk](mailto:M.Farr@bristol.ac.uk)  
Jon Banks<sup>1,2</sup> [Jon.Banks@bristol.ac.uk](mailto:Jon.Banks@bristol.ac.uk)  
Hannah Edwards<sup>1,2</sup> [Hannah.Edwards@bristol.ac.uk](mailto:Hannah.Edwards@bristol.ac.uk)  
Kate Northstone<sup>1,2</sup> [Kate.Northstone@bristol.ac.uk](mailto:Kate.Northstone@bristol.ac.uk)  
Elly Bernard<sup>3</sup> [elly.bernard@onecare.org.uk](mailto:elly.bernard@onecare.org.uk)  
Chris Salisbury<sup>1,2</sup> [C.Salisbury@bristol.ac.uk](mailto:C.Salisbury@bristol.ac.uk)  
Jeremy Horwood<sup>1,2</sup> [J.Horwood@bristol.ac.uk](mailto:J.Horwood@bristol.ac.uk)

1. Population Health Sciences, Bristol Medical School, University of Bristol, Canynge Hall, 39 Whatley Road, Bristol, BS8 2PS, UK.
2. National Institute for Health Research Collaboration for Leadership in Applied Health Research and Care (NIHR CLAHRC) West at University Hospitals Bristol NHS Foundation Trust, 9th Floor, Whitefriars, Lewins Mead, Bristol, BS1 2NT
3. One Care (BNSSG) Ltd, Unit 4 Osprey Court, Hawkfield Business Park, Whitchurch, Bristol, BS14 0BB.

### Corresponding Author:

Michelle Farr  
NIHR CLAHRC West  
9th Floor Whitefriars  
Lewins Mead  
Bristol BS1 2NT  
[M.Farr@bristol.ac.uk](mailto:M.Farr@bristol.ac.uk)  
0117 342 7279

### Word count:

3,995

## ABSTRACT

**Objectives:** An evaluation of implementing an online consultation system into UK primary care practices. We describe how e-consultations changed the way that general practice (GP) services were produced and experienced, and with what consequences, for patients and GPs.

**Design:** Mixed method evaluation of a primary care e-consultation system.

**Setting:** Primary care practices in south-west England.

**Methods:** Qualitative interviews with 23 practice staff in 6 practices. Patient survey data for 756 e-consultations from 36 practices, with free text survey comments from 512 patients, were analysed thematically. Anonymised patients' records were abstracted for 485 e-consultations from 8 practices, including consultation types and outcomes. Statistical analysis included descriptive statistics, chi-square tests or odds ratios with 95% confidence intervals and p-values. Analysis of implementation and usage of the e-consultation system was informed by: (a) normalisation process theory, (b) a process map that illustrates how e-consultations were co-produced, and (c) patients' and staff touchpoints.

**Results:** We found different expectations between patients and staff on how to use e-consultations 'appropriately'. Whilst some patients used the system to try and save time for themselves and their GPs, some used e-consultations when they could not get a timely face-to-face appointment. Most e-consultations resulted in either follow-on phone (32%) or face-to-face appointments (38%) and GPs felt that this duplicated their workload. Patient satisfaction of the system was high, but a minority were dissatisfied with practice communication about their e-consultation.

**Conclusions:** Where both patients and staff interact with technology, it is in effect 'co-implemented'. How patients used e-consultations impacted upon practice staff's experiences and appraisal of the system. Overall, e-consultations were not an immediate solution for efficiency savings, but could improve access for some patients. Mapping the co-production of the e-consultation process through touchpoints provides an analytic lens to understand how the e-consultation system and its implementation can be improved.

## Keywords

Co-production, telemedicine, normalisation process theory, online consultations, primary care, touchpoints

## Strengths and limitations of this study

- Largest UK study to date examining staff and patient experiences of using a primary care online consultation system.
- Extending normalisation process theory with service co-production theory enables an in-depth understanding of how patients and staff interacted with the e-consultation system.
- Touchpoint analysis enables improvements to be suggested to develop the design and implementation of online consultation systems, aimed at software designers, policymakers and general practices interested in this technology.
- This observational study was based on a pilot period of one online consultation system; and issues highlighted may be due to the system studied, rather than all online consultation systems.

## BACKGROUND

English general practice clinical workload has risen by 16% over the period 2007-14.<sup>1</sup> 93% of general practitioners (GPs) say their workload has negatively impacted on quality of care given to patients.<sup>2</sup> Average waiting times for an appointment have been reported as just under 13 days.<sup>3</sup>

Internationally, policymakers are advocating technological alternatives to face-to-face primary care consultations to improve service quality.<sup>4</sup> UK policy to improve primary care access includes the Prime Minister's Challenge Fund (now the GP Access Fund),<sup>5</sup> and the General Practice Forward View.<sup>6</sup> These promote greater use of technology to manage workload and improve patient access, with £45 million made available to support the implementation of online consultation systems.<sup>7</sup> Online or e-consultations enable patients to contact their GP via a mobile app or online portal.<sup>7</sup> General practice staff attitudes toward electronically based consultations include concerns about medico-legal issues, clinical limitations and increasing workload concerns.<sup>8-10</sup> Research into practitioners' and patients' actual experiences of e-consultations is limited, but timely, as implementation is at an early stage.<sup>4 10</sup>

A consortium of general practices in south west England [One Care],<sup>11</sup> received funding through the GP Access Fund,<sup>5</sup> to pilot online consultations. Starting in April 2015, the eConsult system<sup>12</sup> (previously called WebGP) was implemented free of charge into 36 general practices. Patients access the eConsult system (referred to as 'the system' in this paper) via their own GP practice website. They can access self-help, pharmacy advice, 111 (NHS non-emergency telephone advice), administrative help (such as repeat prescriptions), or submit an online form with details of their condition, electronically sending this to their GP practice, where it is then processed. If the system identifies signs or symptoms that may require immediate medical attention, patients are redirected

to appropriate services, otherwise the system informs patients that their GP practice will contact them by the end of the next working day.

Normalisation process theory (NPT) illustrates issues to address when implementing a technology or complex intervention (Table 1).<sup>13-15</sup>

**Table 1: NPT constructs in association with the implementation of e-consultations**

| NPT Construct                  |                                                                                                                                                  |
|--------------------------------|--------------------------------------------------------------------------------------------------------------------------------------------------|
| <b>Coherence</b>               | Sense-making work to understand the possibilities of an intervention. <i>What are the purposes of e-consultations?</i>                           |
| <b>Cognitive participation</b> | Relational work that builds a community of practice around an intervention. <i>What promotes participation with e-consultations?</i>             |
| <b>Collective action</b>       | Operational work that people enact to make an intervention function. <i>How do participants interact with e-consultations to make them work?</i> |
| <b>Reflexive monitoring</b>    | Appraisal work where people assess how a new practice affects them and others. <i>How do participants appraise e-consultations?</i>              |

Patients' perspectives of implementing technology have been researched less;<sup>16</sup> and NPT may need to be developed to account for patients' implementation roles.<sup>17-20</sup> With e-consultations patients input details of their symptoms, which produces the e-consultation that the practice then processes. In this way, an e-consultation is co-produced; both patients and staff are integral to the process. This article examines 'co-production in the implementation of core services' where 'citizens are actively engaged in the implementation, but not the design, of an individual service'<sup>21</sup> (p.433). We develop NPT to analyse patients' implementation roles, using service co-production theory<sup>21-28</sup> to understand how both patients and staff co-implement and use technology.

We undertook an evaluation of eConsult to analyse patient usage, acceptability, effectiveness and costs of implementing the system in the 36 general practices, incorporating a quantitative, qualitative and economic analysis. The quantitative and economic analysis on usage and costs<sup>29</sup> and interviews with practice staff about e-consultations<sup>30</sup> are reported separately. This article analyses the implementation and acceptability of the eConsult system, using normalisation process theory (NPT)<sup>13</sup> and service co-production theory<sup>21-28</sup> to understand staff and patients' experiences of the system.

## METHODS

### Research design

Data was collected that covered up to 15 months usage of the system by GP practices, and consisted of three components:

1. Qualitative interviews with staff from a sample of 6 GP practices
2. Electronic medical records for patients who had conducted an e-consultation from a sample of 8 GP practices
3. Patient survey data from patients who had conducted an e-consultation about their experiences of e-consultations from all 36 GP practices.

### Sampling and recruitment

To conduct qualitative staff interviews and collect anonymised patient record data, GP practices were purposively sampled to ensure a range of: locations (rural/suburban/urban); practice levels of deprivation measured by the Index of Multiple Deprivation (IMD)<sup>31</sup> from practice postcodes; and volume of e-consultation usage (calculated by dividing the number of e-consultations received by the number of days the system was live at time of sampling). Table 2 illustrates the range of practices recruited, with details of the eight practices purposively sampled to collect anonymised patient medical record data from e-consultations, and the six practices purposively sampled to conduct qualitative interviews. A purposive sample of staff with different professional roles from these six practices involved in the processing or managing of e-consultations were invited to be interviewed via email with participant information sheets, with contacts and invitations facilitated by practice managers. Practice protocols on using the system were also given to the researchers where they were available.

**Table 2: Sampled GP practice and interview participant profiles**

| GP Practice | E-consultations per day live (range 0.1-2.9 for 36 practices) | IMD levels of deprivation (mean English score = 23.7 <sup>31</sup> , high score=most deprived) | Area  | % ethnic minority population | Staff interviews     | Number of e-consultations randomly sampled from electronic patient record data |
|-------------|---------------------------------------------------------------|------------------------------------------------------------------------------------------------|-------|------------------------------|----------------------|--------------------------------------------------------------------------------|
| <b>1</b>    | 2.9                                                           | 21.1                                                                                           | Urban | 18.6%                        | 2 GPs, 1 AD,<br>1 PM | 64                                                                             |
| <b>2</b>    | 0.9                                                           | 8.0                                                                                            | Rural | 1.9%                         | 2 GPs, 2 AD,<br>1 PM | 60                                                                             |
| <b>3</b>    | 1.6                                                           | 40.7                                                                                           | Urban | 36.3%                        | 2 GPs, 1 AD,         | 70                                                                             |

|    |     |      |          |       | 1 PM                       |    |
|----|-----|------|----------|-------|----------------------------|----|
| 4  | 0.2 | 46.7 | Urban    | 9.4%  | 1 GP, 1 AD,<br>1 PM        | 0  |
| 5  | 0.7 | 31.3 | Urban    | 6.1%  | 1 GP, 1 PM                 | 38 |
| 6  | 0.8 | 13.0 | Urban    | 11.6% | 2 GPs, 1 NP,<br>1 AD, 1 PM | 0  |
| 7  | 2.2 | 24.4 | Urban    | 12.9% | 0                          | 60 |
| 8  | 1.2 | 11.2 | Suburban | 8.3%  | 0                          | 60 |
| 9  | 0.6 | 8.0  | Urban    | 7.9%  | 0                          | 66 |
| 10 | 1.5 | 11.3 | Urban    | 10.0% | 0                          | 67 |

### Qualitative interviews and analysis

Interviews were conducted with 23 practice staff including: 10 GPs, 1 nurse practitioner (NP) (this interviewee is designated with (GP) notation to avoid potential identification), 6 practice managers (PM), and 6 'administrators' including an IT manager and receptionists (AD) (see Table 2). Interviews took place both face to face within general practice private offices (n=20) and over the phone (n=3), and lasted between 10-40 minutes. All participants gave full informed consent. Interviews were semi-structured, using a topic guide that had been developed with reference to NPT<sup>13</sup> covering: (i) introduction of e-consultations into the practice; views, promotion, training needed, (ii) e-consultation processing, (iii) impact on workload, (iv) impact on clinical practice, and (v) attitudes to future implementation. All interviews were audio recorded, transcribed, anonymised, checked for accuracy and imported into NVivo 10 software to aid analysis. Inductive thematic analysis was used grounded in the data,<sup>32</sup> NPT was then used as a framework to order the codes. Analysis was conducted by two researchers (MF and JB) with a subset double coded to ensure rigour. Data collection and analysis was conducted in parallel, with participants sampled until data saturation was reached. Key analytic themes were discussed within the research team to enhance credibility and external validity.

### Patient record data

Electronic anonymised patient record data were collected from a random sample of patients (n=485) who had used e-consultations from eight of the participating practices (Table 2), between April 2015 to June 2016. A staff member from a participating practice retrospectively extracted anonymised patient data from patient records onto an Excel database from all practices, including: patient demographics; reason for contact; the actions taken resulting from the e-consultation (e.g. telephone call, face-to-face appointment, email advice); and further care provided by the practice in the next 30 days in relation to the e-consultation (e.g. treatment room tests, nurse appointments,



1  
2  
3 further GP consultations etc.). When analysing practice responses to e-consultations, the primary  
4 response was designated as the most resource-intensive action (i.e. a face to face appointment is  
5 more resource intensive than a phone appointment than a prescription), and the secondary action  
6 was the next most resource intensive (i.e. a prescription or advice) to account for multiple e-  
7 consultation processes.<sup>29</sup> Descriptive statistics were used to analyse these, and where appropriate,  
8 chi-square tests or odds ratios with 95% confidence intervals and p-values calculated.<sup>29</sup> The primary  
9 clinical reason for patients using an e-consultation was cross tabulated with the primary response to  
10 the e-consultation from practice staff (Supplementary file, Table A).  
11  
12  
13  
14  
15

### 16 **Patient survey data**

17  
18 Patient survey data was routinely collated by the e-consultation software company [Hurley], using  
19 their own survey design. Patients who opted in were sent a questionnaire seven days after the  
20 submission of their e-consultation. This contained both tick box questions and free text. We were  
21 given access to this anonymised data from the software company for the 36 pilot GP practices from  
22 April 2015 to June 2016. The tick box questions were analysed using descriptive statistics  
23 (Supplementary file, Table B). Free text comments were coded using inductive thematic analysis  
24 grounded in the data,<sup>32</sup> NPT was then used as a framework to order the codes. Answers were  
25 analysed by two researchers (MF and JB), with a subset double coded. Patient survey quotes are  
26 labelled P01, P02... in the following data analysis. From 7,472 e-consultations, a total of 751 patients  
27 (10%) submitted a survey with quantitative data, and additional comments to individual questions  
28 ranged from 38 to 512 patients (Supplementary file, Tables B-C).  
29  
30  
31  
32  
33  
34  
35

### 36 **Using NPT and co-production to integrate patient and staff perspectives**

37  
38 The NPT concepts of *coherence* and *cognitive participation* were analysed using staff interviews and  
39 patients' survey responses. *Coherence* explored staff and patients' expectations of the system and  
40 how the system's purpose and possibilities were understood. *Cognitive participation* explored the  
41 relational work that promoted engagement with e-consultations. *Collective action* explores how the  
42 system was operationalised. Process mapping using both patient and staff data enabled an  
43 understanding of how patients and staff co-implement and co-produce an e-consultation process  
44 through their interactions.<sup>25</sup> Initially an e-consultation workflow process map for each practice was  
45 developed from staff interviews and practice protocols on using the system. These were integrated  
46 to illustrate core practice processes. 'Touchpoints'<sup>24,33</sup> were identified, where patients and staff  
47 interacted through the e-consultation process.<sup>34</sup> Touchpoints are where 'people and tangible things'  
48 shape service experiences.<sup>22,33-35</sup> They have been used in co-production literature<sup>24,33</sup> and health  
49 service improvement methods such as experience based co-design.<sup>36-38</sup> Here they were used as an  
50  
51  
52  
53  
54  
55  
56  
57  
58  
59  
60

1  
2  
3 analytic lens to examine the operational work and experiences of both staff and patients through an  
4 e-consultation. The process map and key touchpoints are illustrated in Figure 1 and analysed in the  
5 *Collective action* results section. *Reflexive monitoring* explored staff and patient appraisal of the  
6 system, analysing when e-consultations may work for whom. The cross tabulation of patients'  
7 clinical reasons for using an e-consultation with practice staff responses (Supplementary file, Table  
8 A), was combined with the analysis of staff and patients' satisfaction with the system, integrating all  
9 data sets.  
10  
11  
12  
13

## 14 RESULTS

15 The results are presented using the four NPT concepts, as detailed above.  
16  
17

### 18 Coherence

19 Coherence describes patients' and staff understandings of the system's purpose. E-consultations  
20 were seen by practice staff as a new and different way of working that had the potential to reduce  
21 GP workload pressures:  
22  
23  
24

25 *We are massively overstretched ... So, that was one of the reasons why I wanted [eConsult],*  
26 *was so that we could make it easier... to deal with queries and often relatively simple queries*  
27 *that come through (PM23).*  
28  
29  
30

31 Practices were aware of the difficulties patients faced in securing GP appointments and e-  
32 consultations were seen to provide a different pathway to care and advice. The pilot provided  
33 practice managers with an opportunity to test out the system without financial investment.  
34  
35

36 Patients saw e-consultations as a new, alternative way to communicate with their practice, that  
37 could be used out of surgery hours, from 'my bed' (P507) or on holiday: 'It is quick and easy to use at  
38 a time to suit myself. Saves having to call the surgery' (P61). Several patients' comments exhibited  
39 an understanding of the pressures that practices were under: 'It saves the GP time, saves me coming  
40 to the practice, great all round' (P81).  
41  
42  
43  
44

### 45 Cognitive participation

46 Cognitive participation describes the relational work that people were involved in to promote  
47 participation with the system. Implementing e-consultations within practices was reported by  
48 practice staff as a relatively straight forward process, with little training needed. However, there  
49 were varying feelings toward it:  
50  
51  
52

53 *We were quite happy to do it (AD08).*  
54  
55  
56  
57  
58  
59  
60

1  
2  
3 *I was feeling very anxious about the extra workload ... some things feel like a bottomless pit*  
4 (GP22).  
5  
6

7 Practices employed different promotion methods to patients to varying degrees including through  
8 their website, waiting room banners, leaflets, social media, and newsletters. In some practices, there  
9 was a feeling that there was not as much uptake of the system as expected.  
10

11 Some patients were activated to use the system because they couldn't get an appointment: *'No*  
12 *available appointment for 2 weeks'* (P10); *'Tried Switchboard nine times ... Went online'* (P05). Others  
13 favoured the online format and remote consultation style, they used the system as it was difficult to  
14 visit the practice due to disabilities, illness or working commitments, or saw it was a more legitimate  
15 way to access GP advice: *'didn't want to waste Drs time with a full consultation which I didn't need'*  
16 (P171).  
17  
18  
19  
20  
21  
22

### 23 **Collective action**

24 *Collective action* describes how the system was operationalised in practice by patients and staff.

25 Figure 1 maps where staff and patients interact through an e-consultation process, identifying three  
26 touchpoints<sup>2</sup>, key interactions and experiences through the co-production of an e-consultation.  
27  
28  
29

### 30 **Figure 1: E-consultation process map highlighting key touchpoints**

#### 31 **Touchpoint 1: Patient interaction with e-consultation system**

32  
33 Touchpoint 1 in Figure 1 relates to patients' initial decision to complete an e-consultation form, and  
34 their interaction with the system. Most patient survey respondents agreed that the system was easy  
35 to use (Supplementary file, Table B): *'had no problems at all'* (P398). It was *'helpful to be able to*  
36 *contact about minor requests'* (P475). Some patients preferred the written interface over a verbal  
37 conversation: *'Allowed me time to describe symptoms in greater detail than talking'* (P279). Patients  
38 reported that the system did not seem to account for multiple conditions.  
39  
40  
41  
42  
43

#### 44 **Touchpoint 2: GP Practice processing of e-consultations**

45 During the pilot, the system was not integrated with the patient record IT system [EMIS] that  
46 practices used. Administrators downloaded patients' e-consultations from the system and printed  
47 them or manually imported them into patients' records. Some administrators spoke of conducting  
48 some triage e.g. directing hay fever queries to pharmacy. Clinicians described variability in the  
49 quality of information from the e-consultation forms. Whilst information could be: *'clear and*  
50 *concise'* (GP13), this was not always the case:  
51  
52  
53  
54  
55  
56  
57  
58  
59  
60

1  
2  
3 *One patient needed to be admitted [to hospital] ... Because the symptoms weren't very clear*  
4 *(GP05).*  
5  
6  
7

8 Most GPs often reverted to face to face or phone conversations to gain more information to conduct  
9 clinical decision-making.<sup>29 30</sup> One clinician who had substantial experience of conducting phone  
10 triage, reported that they dealt with most e-consultations without needing to see patients face-to-  
11 face, unless it was for new acute symptoms/ diagnosis. This potentially suggests that GPs may get  
12 more used to this approach over time.  
13  
14  
15

### 16 Touchpoint 3: GP Practice interaction with patients following their e-consultation

17 Practices organised follow-up appointments in different ways. In some, a face to face appointment  
18 might have to '*start from scratch*' (GP05), because a different clinician originally dealt with the e-  
19 consultation:  
20  
21  
22

23 *I had to repeat everything I entered on line. What's the point in asking if you're not going to*  
24 *read it? (P90)*  
25  
26

27 Other practices had more continuity where GPs could follow through the e-consultation, which  
28 provided benefits to the consultation:  
29  
30

31 *The actual face to face consultation is then quicker, and that's quite nice in some ways ...it*  
32 *doesn't open up other avenues, to a degree, okay, so it's more efficient (GP18)*  
33  
34  
35

36 Reception staff usually contacted patients via a practice email address or phone, to relay a message  
37 from a GP to patients, or to arrange the next step or outcome of their e-consultation. Occasionally,  
38 patients who had had no opportunity to speak to a doctor, were unhappy about this: '*I had no*  
39 *opportunity to ask any questions*' (P44). Some patients reported missing practice phone calls, one  
40 spoke of '*telephone answer machine ping-pong*' (P275). 14% of survey respondents reported not  
41 being contacted at all following their e-consultation (surveys were sent seven days after an e-  
42 consultation submission) which left patients dissatisfied (Supplementary file, Table B):  
43  
44  
45  
46  
47

48 *I feel like my treatment has been compromised and delayed as a result of this service (P48)*  
49  
50  
51

52 The system had an in-built function to electronically respond to a patient's email address; however  
53 only one out of six practices where interviews were conducted said they used this, and not all staff  
54 could access the system.  
55  
56  
57

1  
2  
3 Patient record data illustrates that 38% of e-consultations resulted in a primary response of a face to  
4 face consultation.<sup>29</sup> Several patients commented that they had received easier access to a face to  
5 face appointment through the system:  
6

7  
8 *The service recommended immediate attention that resulted in a quicker appointment than*  
9 *otherwise would have been the case (P313)*  
10

11 Whilst a face to face consultation often satisfied patients, it could potentially duplicate GP  
12 workload,<sup>30</sup> with initial e-consultation processing by administrators and a GP, plus an appointment  
13 space. 32% of e-consultations resulted in a primary response of a phone consultation. Where e-  
14 consultations resulted in a primary response of a prescription (7.2%), a 'fit note' statement of fitness  
15 for work (3.1%), test or treatment request (1.6%), referral (1.6%) or advice (9.1%) (occurring in 23%  
16 of patient e-consultation records),<sup>29</sup> these could save GP time as administrative staff relayed  
17 messages and there was no direct contact between the patient and GP.  
18  
19  
20  
21  
22

### 23 **Reflexive monitoring: Who do e-consultations work for, and when?**

24 *Reflexive monitoring* describes how patients and staff appraised the system, integrating all data sets  
25 to explore when e-consultations were likely to work best for whom.  
26  
27

28 Patients' satisfaction with the system was high and most (81%) were likely to recommend the  
29 system to others. 76% said they would use the service again instead of booking a face to face  
30 appointment (Supplementary file, Table B). Dissatisfaction with the system was usually a result of:  
31 lack of interaction with a GP; missed communications; thinking that their query could be answered  
32 remotely, and then being asked to book an appointment; or lack of timely follow-up of their e-  
33 consultation. Several patients suggested improvements (at touchpoint 1) that have since been  
34 integrated into the system by the software developers e.g. the ability to upload photos; being able  
35 to nominate a preferred GP; and an administration channel for requests such as a fit note or test  
36 results.  
37  
38  
39  
40  
41  
42

43 Interviews revealed that clinical staff were less satisfied with the system, as time saved in  
44 completing e-consultations without further GP-patient communication (23%), was counterbalanced  
45 by e-consultation processing and GPs needing to phone or see patients in 70% of e-consultations,  
46 which could duplicate GP work.<sup>30</sup> Analysing why patients were e-consulting and the resulting action  
47 (Supplementary file, Table A, and <sup>29</sup>), and combining this with staff and patients' appraisal of the  
48 system, Table 3 summarises when e-consultations were likely to work and be effective for patients  
49 and GPs. For GPs, it was only for relatively straightforward queries that the system could save  
50 substantial time. Patients were satisfied more often as e-consultations could: save them time, get  
51  
52  
53  
54  
55  
56  
57  
58  
59  
60

them a quicker appointment, provide an easier access route to GP services, or they preferred the remote access format.

**Table 3: Nature of e-consultations and the resulting possible satisfaction and dissatisfaction of staff and patients**

| Nature of query                                                             | Patients' satisfaction                                | Practice staff satisfaction                                           |
|-----------------------------------------------------------------------------|-------------------------------------------------------|-----------------------------------------------------------------------|
| Administrative queries                                                      | ✓<br>Most processed remotely                          | ✓<br>Most processed remotely                                          |
| Medication queries and simple queries about pre-existing patient conditions | ✓<br>Most processed remotely by phone or prescription | ✓<br>Most processed remotely by phone or prescription                 |
| Queries about new conditions                                                | ✓<br>May get quicker response                         | X<br>Face to face appointment more likely - possible work duplication |
| Complex questions, multiple symptoms                                        | ✓<br>May get quicker response                         | X<br>Face to face appointment more likely - possible work duplication |

Practice suggestions for system improvement (at touchpoint 1) included that patients could be signposted away from consulting a GP more often, to encourage more self-help or use of pharmacy when 'appropriate' (AD11), to 'make people aware that they're in some cases wasting GP's time' (AD04). Some practice staff suggested that patients might be guided to use e-consultations under certain conditions where only remote GP input was likely to be needed (as in Table 3). In contrast, if a patient had multiple symptoms for a new condition for which a face to face appointment was likely to be needed, GPs suggested that a modified system could flag this, directing patients not submit an e-consultation but to directly book a face to face appointment, to avoid GP work duplication.

Comparatively analysing different practice processing of e-consultations (touchpoint 2) suggests that administrative allocation of e-consultations to GPs could affect process efficiency. If administrators allocated e-consultations to a GP who had previously seen the patient (especially about similar symptoms/ conditions) this may support more efficient processing, as GPs would be more familiar with the patient and condition:

*We like to look at each patient's notes to find out which doctor perhaps has seen this patient for that particular problem and then we would know where to direct that e-consultation* (AD09)

Administrators could also book face to face or phone consultations with the GP who had processed the e-consultation and was familiar with the patient query. This could focus the appointment, and avoid situations where patients felt that GPs appeared not to have read their e-consultation.

Improvements at touchpoint 3 (practice interaction with patients about e-consultations) include more robust practice communication mechanisms to reduce patient dissatisfaction about practice communication relating to their e-consultation. This could be supported by integration with electronic practice IT systems,<sup>16</sup> and further use of electronic communications back to patients that more staff can access and use.

Summarising this touchpoint analysis, highlights potential improvements to the system and its implementation (Table 4).

**Table 4: Suggested improvements to implement the e-consultation system**

| <b>Issues identified with Touchpoint 1: Patient decides to fill in an e-consultation form</b>                                                                                                                            | <b>Suggested technological improvements</b>                                                                                                                       |
|--------------------------------------------------------------------------------------------------------------------------------------------------------------------------------------------------------------------------|-------------------------------------------------------------------------------------------------------------------------------------------------------------------|
| Patients suggested several ways to improve system usability, such as: the ability to upload photos; being able to nominate a preferred GP; and an administration channel for requests such as a fit note or test results | Software developers have implemented these improvements to the system in its ongoing development                                                                  |
| Practice staff suggested that the system could encourage more use of pharmacy or self-help options where appropriate                                                                                                     | Better signposting to pharmacy and self-help options on website interface                                                                                         |
| Promoting patients to use e-consultations for simple conditions and questions to save face to face appointments                                                                                                          | Appropriate patient signposting on when to complete an e-consultation                                                                                             |
| Reducing patient e-consultation usage when they need a diagnosis about new, complex and multiple symptoms                                                                                                                | Appropriate patient signposting on when not to complete an e-consultation but to directly book a face to face appointment to save practice staff work duplication |
| Reducing the use of the e-consultation system to directly access face-to-face appointments                                                                                                                               | Signposting to discourage patient use of the system if they want a face to face appointment                                                                       |
| <b>Issues identified with Touchpoint 2: Practice processing of e-consultations</b>                                                                                                                                       | <b>Suggested practice implementation improvements</b>                                                                                                             |
| Some GPs received e-consultations that could have been dealt with by a pharmacy                                                                                                                                          | Administrative triage where appropriate e.g. directing hay fever queries to pharmacy, to save GP time                                                             |
| Supporting more efficient processing of e-consultations, and potentially reduce follow-on face to face consultations                                                                                                     | Allocate e-consultations to GPs who are familiar with the patient and their symptoms, where appropriate                                                           |
| <b>Issues identified with Touchpoint 3: Practice</b>                                                                                                                                                                     | <b>Suggested improvements</b>                                                                                                                                     |



### interaction with patients about e-consultations

|                                                                                                                         |                                                                                                                                                                                                                                                                               |
|-------------------------------------------------------------------------------------------------------------------------|-------------------------------------------------------------------------------------------------------------------------------------------------------------------------------------------------------------------------------------------------------------------------------|
| Patient complaints that they had to repeat information in consultation as GPs appeared not to have read e-consultations | Allocate follow-on phone and face-to-face appointments to GPs who initially process e-consultations                                                                                                                                                                           |
| Patients missing or not receiving communication back from the practice about their e-consultation                       | More robust internal practice systems to ensure that patients receive communication back about their e-consultations<br>Stronger e-consultation and practice IT integration to support electronic communications back to patients that more practice staff can access and use |

None of the 36 practices took up the system after the pilot, which would have involved paying market prices for the software. However, 13 practices were interested in continuing to use the system if costs were paid for by alternative funding sources, and technological interoperability with electronic patient record systems was further developed.

## DISCUSSION

### Key findings

Practices were originally interested in the system to improve access and create efficiencies. Whilst some patients used the system to try and save time for both themselves and their GPs, other patients were activated to use e-consultations when they could not get a timely appointment. Because practices were dependent upon patients deciding how and when to use e-consultations, clearer guidance may be needed for patients to support more efficient use of e-consultations (see Table 4, touchpoint 1).

Our findings highlight the difficulties in substituting real time interaction with an asynchronous technological interface (touchpoints 2 and 3). This could reduce professionals' ability to use tacit knowledge of patients concerns, patients' ability to negotiate treatment options and shared decision-making. GPs often needed further information when processing e-consultations, leading to face to face and phone consultations. However, the system was being piloted, which meant that GPs were developing their skills in e-consultations, so phone and face to face consultations may decrease over time. GPs speculative fears about the perceived risks to patients of online consultations and the potential increases in workload<sup>2 10</sup> are to some extent causally linked through this study. The asynchronous communication mechanisms meant that GPs had to initiate face to face and phone consultations where they needed further information, which could duplicate workload. For more



1  
2  
3 efficient implementation of e-consultations, further consideration may be needed of when it is  
4 appropriate to use technology e.g. for less complex tasks,<sup>9</sup> and when face to face interaction is  
5 essential, such as in the diagnosis of complex symptoms<sup>39</sup> (Table 3 and 4).  
6  
7

### 8 **Strengths and limitations**

9  
10 This study is one of the largest UK pilot independent evaluations of e-consultation systems within GP  
11 practices to date. The broad sample of practice staff interviewed, combined with patient survey data  
12 allows a comprehensive insight into the e-consultation system. Combining NPT and co-production  
13 theory has enabled the integration of staff's and patients' perspectives; touchpoint analysis has  
14 suggested improvements to be developed. However, because the study was based on a pilot period  
15 of one online consultation system; the issues highlighted may be a result of the system studied,  
16 rather than all online consultation systems. Patient surveys were only sent to patients who had  
17 submitted an e-consultation; thus representing a self-selecting sample of those who had invested  
18 time into the system. Because usage was low,<sup>29</sup> those patients using the system may be  
19 unrepresentative of the wider patient population.  
20  
21  
22  
23  
24  
25

### 26 **Policy and practice implications**

27  
28 Technology is often promoted to improve NHS efficiency,<sup>40</sup> but benefits are often more limited due  
29 to implementation difficulties.<sup>16</sup> In this study, no practices experienced sufficient workload savings  
30 to warrant practices own financial investment in the system at current market prices, however the  
31 system did improve access for some patient groups. NHS England has offered financial support for  
32 practices to adopt online consultations, this research affirms that clear implementation guidance is  
33 also needed.<sup>41</sup> This study has suggested improvements to support future implementation and  
34 technological development of e-consultation systems (Table 4).  
35  
36  
37  
38  
39

### 40 **CONCLUSIONS**

41  
42 E-consultations can increase patient access and satisfaction, but in their current form, were not  
43 perceived as creating sufficient workload efficiencies for continued practice usage. Patients' use of e-  
44 consultations impacted upon staff's appraisal of the system. Where both patients and staff interact  
45 with healthcare technology, it is in effect 'co-implemented'. Mapping the co-production of an e-  
46 consultation through touchpoints<sup>33 34</sup> has highlighted where the system may be redesigned or  
47 implementation improved. This analysis can support more effective implementation of appropriate  
48 technology that accounts for professional and patient experiences.  
49  
50  
51  
52  
53  
54  
55  
56  
57  
58  
59  
60

## FOOTNOTES

### Acknowledgements

Authors thank staff from participating practices for assisting with the collection of individual-level data, and the software developers for providing web usage statistics and anonymous patient survey data.

### Funding

This research is funded by the One Care Consortium Ltd and the National Institute for Health Research (NIHR) Collaboration for Leadership in Applied Health Research and Care West at University Hospitals Bristol NHS Foundation Trust. The One Care Consortium facilitated data collection. The views expressed are those of the authors and not necessarily those of the NHS, the NIHR or the Department of Health.

### Competing interests

None declared.

### Ethical approval

The study was reviewed by the NHS Health Research Authority (project ID: 204925) and ethically reviewed by the University of Bristol, Faculty of Health Sciences, Research Ethics Committee (Application 32961).

### Contributors

KN, JH, HE, MF, JB, and EB were responsible for the study design and collection of data. KN, JH and EB were responsible for study management and co-ordination. CS was a project advisor throughout. MF, JB, HE and KN analysed the data. MF drafted the paper. All authors read, commented on and approved the final manuscript.

### Data sharing statement

The datasets analysed during the current study are not publicly available, as participants were not asked to consent to this at the time of data collection. Related patient survey results are available in the Supplementary file.

### Supplementary file

Table A: Reason for e-consultation by primary response from practice staff (patient record data)

Table B: Patient survey – how and why accessed e-consultations, and resulting satisfaction

Table C: E-consultation patient survey free text response numbers

## REFERENCES

1. Hobbs FDR, Bankhead C, Mukhtar T, et al. Clinical workload in UK primary care: a retrospective analysis of 100 million consultations in England, 2007-2014. *Lancet* 2016;387(10035):2323-30. doi: 10.1016/S0140-6736(16)00620-6
2. BMA. National survey of GPs: the future of general practice. London: British Medical Association 2015.
3. Kaffash J. Average waiting time for GP appointment increases 30% in a year 2016 [updated 10 June 2016]. <http://www.pulsetoday.co.uk/your-practice/access/average-waiting-time-for-gp-appointment-increases-30-in-a-year/20032025.article>.
4. Atherton H, Ziebland S. What do we need to consider when planning, implementing and researching the use of alternatives to face-to-face consultations in primary healthcare? *Digit Health* 2016;2:2055207616675559. doi:10.1177/2055207616675559
5. NHEngland. GP Access Fund: NHS England; 2013. <https://www.england.nhs.uk/gp/gpfv/redesign/improving-access/gp-access-fund/> (accessed 17 Jan 2017).
6. NHEngland. General Practice Forward View. NHS England, 2016.
7. NHEngland. Online Consultation Systems: NHS England; 2016. <https://www.england.nhs.uk/gp/gpfv/redesign/gpdp/consultation-systems/> (accessed 10 Feb 2017).
8. Hanna L, May C, Fairhurst K. Non-face-to-face consultations and communications in primary care: the role and perspective of general practice managers in Scotland. *Inform Prim Care* 2011;19(1):17-24.
9. Hanna L, May C, Fairhurst K. The place of information and communication technology-mediated consultations in primary care: GPs' perspectives. *Fam Pract* 2012;29(3):361-6. doi: 10.1093/fampra/cmr087
10. Brant H, Atherton H, Ziebland S, et al. Using alternatives to face-to-face consultations: a survey of prevalence and attitudes in general practice. *Br J Gen Pract* 2016 doi: 10.3399/bjgp16X685597
11. The One Care Consortium. <http://onecareconsortium.co.uk/about/pmcf-programme/> (accessed 17 Jan 2017).
12. EMISHealth. eConsult: A platform that enables patients to self-manage and consult online: Emis Health; 2016. <https://www.emishealth.com/products/econsult/> (accessed 30 Jun 2016).
13. May C, Finch T. Implementing, Embedding, and Integrating Practices: An Outline of Normalization Process Theory. *Sociology* 2009;43(3):535-54. doi: 10.1177/0038038509103208
14. Murray E, Treweek S, Pope C, et al. Normalisation process theory: a framework for developing, evaluating and implementing complex interventions. *BMC Med* 2010;8(1):1-11. doi: 10.1186/1741-7015-8-63
15. May C, Rapley T, Mair FS, et al. Normalization Process Theory On-line Users' Manual, Toolkit and NoMAD instrument. 2015. <http://www.normalizationprocess.org>.
16. Ross J, Stevenson F, Lau R, et al. Factors that influence the implementation of e-health: a systematic review of systematic reviews (an update). *Implement Sci* 2016;11(1):146. doi: 10.1186/s13012-016-0510-7
17. Gibson J, Lightbody E, McLoughlin A, et al. 'It was like he was in the room with us': patients' and carers' perspectives of telemedicine in acute stroke. *Health Expect* 2016;19(1):98-111. doi: 10.1111/hex.12333
18. Kennedy A, Vassilev I, James E, et al. Implementing a social network intervention designed to enhance and diversify support for people with long-term conditions. A qualitative study. *Implement Sci* 2016;11(1):1-15. doi: 10.1186/s13012-016-0384-8

19. Clarke DJ, Godfrey M, Hawkins R, et al. Implementing a training intervention to support caregivers after stroke: a process evaluation examining the initiation and embedding of programme change. *Implement Sci* 2013;8(1):96. doi: 10.1186/1748-5908-8-96
20. Connell LA, McMahon NE, Harris JE, et al. A formative evaluation of the implementation of an upper limb stroke rehabilitation intervention in clinical practice: a qualitative interview study. *Implement Sci* 2014;9(1):1-12. doi: 10.1186/s13012-014-0090-3
21. Brandsen T, Honingh M. Distinguishing Different Types of Coproduction: A Conceptual Analysis Based on the Classical Definitions. *Publ Admin Rev* 2016;76(3):427-35. doi: 10.1111/puar.12465
22. Osborne SP, Radnor Z, Strokosch K. Co-Production and the Co-Creation of Value in Public Services: A suitable case for treatment? *Public Manag Rev* 2016;18(5):639-53. doi: 10.1080/14719037.2015.1111927
23. Batalden M, Batalden P, Margolis P, et al. Coproduction of healthcare service. *BMJ Qual Saf* 2015 doi: 10.1136/bmjqs-2015-004315
24. Radnor Z, Osborne SP, Kinder T, et al. Operationalizing Co-Production in Public Services Delivery: The contribution of service blueprinting. *Public Manag Rev* 2014;16(3):402-23. doi: 10.1080/14719037.2013.848923
25. Alford J. Co-Production, Interdependence and Publicness: Extending public service-dominant logic. *Public Manag Rev* 2016;18(5):673-91. doi: 10.1080/14719037.2015.1111659
26. Ordanini A, Pasini P. Service co-production and value co-creation: The case for a service-oriented architecture (SOA). *EMJ* 2008;26(5):289-97. doi: 10.1016/j.emj.2008.04.005
27. Osborne SP, Radnor Z, Nasi G. A New Theory for Public Service Management? Toward a (Public) Service-Dominant Approach. *ARPA* 2013;43(2):135-58. doi: 10.1177/0275074012466935
28. Osborne SP, Strokosch K. It takes Two to Tango? Understanding the Co-production of Public Services by Integrating the Services Management and Public Administration Perspectives. *British Journal of Management* 2013;24:S31-S47. doi: 10.1111/1467-8551.12010
29. Edwards H, Marques E, Hollingworth W, et al. Use of a primary care online consultation system, by whom, when and why: evaluation of a pilot observational study in 36 general practices in South West England. *BMJ Open* 2017;In Press
30. Banks J, Farr M, Salisbury C, et al. The use of an electronic consultation system in primary care: views and experiences from general practice. *Br J Gen Pract* 2017;In press
31. DCLG. English indices of deprivation: Department of Communities and Local Government; 2015. <https://www.gov.uk/government/collections/english-indices-of-deprivation> (accessed 15 Jan 2016).
32. Braun V, Clarke V. Using thematic analysis in psychology. *Qualitative Research in Psychology* 2006;3:77-101.
33. Parker S, Heapy J. The Journey to the Interface: How public service design can connect users to reform. London: Demos, 2006.
34. Bitner MJ, Ostrom AL, Morgan FN. Service Blueprinting: A practical technique for service innovation. *Calif Manage Rev* 2008;50(3):66-94.
35. Normann R. Service Management: Strategy and Leadership in Service Business. Third ed. Chichester: John Wiley and Sons 2000.
36. Bate P, Robert G. Bringing user experience to healthcare improvement: the concepts, methods and practices of experience-based design. Oxford: Radcliffe Publishing 2007.
37. Boaz A, Robert G, Locock L, et al. What patients do and their impact on implementation. *J Health Organ Manag* 2016;30(2):258-78. doi: 10.1108/jhom-02-2015-0027
38. Wherton J, Sugarhood P, Procter R, et al. Co-production in practice: how people with assisted living needs can help design and evolve technologies and services. *Implement Sci* 2015;10:75. doi: 10.1186/s13012-015-0271-8
39. Jiwa M, Meng X. Video Consultation Use by Australian General Practitioners: Video Vignette Study. *J Med Internet Res* 2013;15(6):e117. doi: 10.2196/jmir.2638

1  
2  
3  
4  
5  
6  
7  
8  
9  
10  
11  
12  
13  
14  
15  
16  
17  
18  
19  
20  
21  
22  
23  
24  
25  
26  
27  
28  
29  
30  
31  
32  
33  
34  
35  
36  
37  
38  
39  
40  
41  
42  
43  
44  
45  
46  
47  
48  
49  
50  
51  
52  
53  
54  
55  
56  
57  
58  
59  
60

40. Greenhalgh T, Procter R, Wherton J, et al. The organising vision for telehealth and telecare: discourse analysis. *BMJ Open* 2012;2(4) doi: 10.1136/bmjopen-2012-001574

41. Stokes-Lampard H, Stodel M, Bullard E, et al. GP Forward View: Assessment of progress Year 1. London: Royal College of General Practitioners, 2017.

**Figure 1: E-consultation process map highlighting key touchpoints**

For peer review only

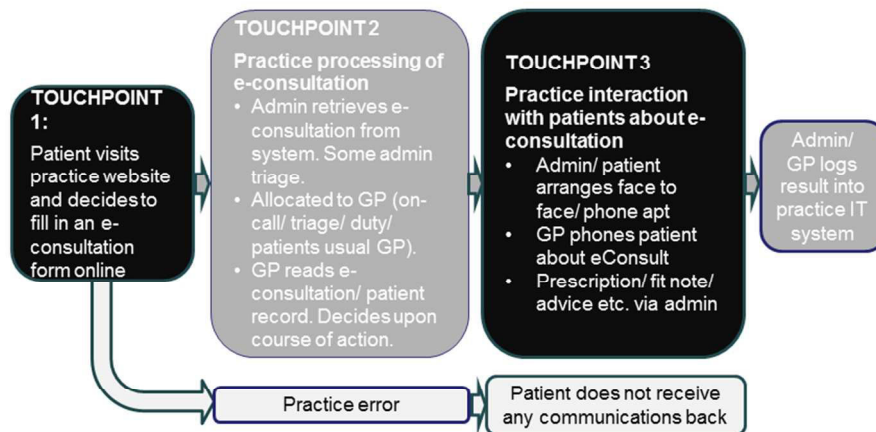

Figure 1: E-consultation process map highlighting key touchpoints

254x190mm (96 x 96 DPI)

## SUPPLEMENTARY FILE

**Table A: Reason for e-consultation by primary response from practice staff (patient record data)**

Table A (Additional file) cross tabulates the primary clinical reason for patients using an e-consultation with the primary response to the e-consultation from practice staff. When analysing practice responses to e-consultations, the primary response was defined as the most resource-intensive action (i.e. a face to face appointment is more resource intensive than a phone appointment than a prescription). This ensured that where there were multiple e-consultation processes, the most resource intense of these was accounted for.

| Reason                      | Total number | Face to face | Phone consult | Prescription | Fit note | Test request | Refer routine | advice | Other/unknown |
|-----------------------------|--------------|--------------|---------------|--------------|----------|--------------|---------------|--------|---------------|
| Musculoskeletal / limb pain | 60           | 48.3%        | 38.3%         | 1.7%         | 0        | 1.7%         | 3.3%          | 1.7%   | 0             |
| Infection/Immunological     | 70           | 40.0%        | 41.4%         | 8.6%         | 0        | 0            | 0             | 0      | 0             |
| Neurological                | 26           | 53.9%        | 26.9%         | 0            | 0        | 3.9%         | 0             | 0      | 3.9%          |
| Sexual/Reproductive health  | 41           | 39.0%        | 41.5%         | 7.3%         | 0        | 4.9%         | 0             | 0      | 2.4%          |
| Dermatological              | 33           | 48.5%        | 21.2%         | 18.2%        | 0        | 0            | 0             | 3.0%   | 0             |
| Respiratory                 | 25           | 52.0%        | 24.0%         | 4.0%         | 0        | 0            | 0             | 0      | 8.0%          |
| Mental health               | 29           | 44.8%        | 34.5%         | 10.3%        | 0        | 0            | 0             | 0      | 0             |
| Digestive                   | 19           | 52.6%        | 26.3%         | 5.3%         | 0        | 0            | 0             | 0      | 5.3%          |
| Medication query/advice     | 19           | 0            | 73.7%         | 10.5%        | 0        | 0            | 0             | 0      | 5.3%          |
| Administrative <sup>a</sup> | 107          | 12.2%        | 27.1%         | 11.2%        | 14.0%    | 1.9%         | 5.6%          | 10.3%  | 7.5%          |
| Other / Unclear             | 53           | 38.4%        | 17.0%         | 0            | 0        | 3.8%         | 0             | 5.7%   | 1.9%          |

<sup>a</sup> fit notes, test results, referrals, repeat scripts, letter requests, booking appointments

**Table B: Patient survey – how and why accessed e-consultations, and resulting satisfaction**

Some of these questions are expanded further with free-text responses, overviewed in Table C.

|                                                              | % (n)       |
|--------------------------------------------------------------|-------------|
| How did you hear about the Consult Online from Home Service? |             |
| My GP told me about it                                       | 0.3% (2)    |
| Someone else from the GP practice                            | 4.2% (33)   |
| From the GP practice website                                 | 58.0% (455) |
| Another patient/family member                                | 4.2% (33)   |
| From an internet search                                      | 5.6% (44)   |
| I read about it                                              | 2.7% (21)   |
| From a leaflet or promotional banner                         | 18.5% (145) |
| Other → Free text                                            | 6.6% (52)   |

|                                                                                                                                                                                                                                                                                                                                                                                                                                                               | % (n)                                                                                                     |
|---------------------------------------------------------------------------------------------------------------------------------------------------------------------------------------------------------------------------------------------------------------------------------------------------------------------------------------------------------------------------------------------------------------------------------------------------------------|-----------------------------------------------------------------------------------------------------------|
| <p>What was the medical reason for using the Consult Online From Home Service?</p> <p>To request a new prescription</p> <p>To request a repeat prescription</p> <p>To request my GP's feedback about an ongoing condition</p> <p>To request my GP's feedback about a new condition</p> <p>To request administrative help, such as a sick note or referral letter</p> <p>Other → Free text</p>                                                                 | <p>11.1% (88)</p> <p>0.5% (4)</p> <p>29.4%(239)</p> <p>41.5% (329)</p> <p>9.3% (74)</p> <p>8.2% (65)</p>  |
| <p>Was there a practical reason why you used the Consult Online from Home Service?</p> <p>I didn't have time to come in</p> <p>I wasn't able to have the appointment time I wanted</p> <p>I wanted to try out the service as an alternative to an appointment</p> <p>No practical reason</p> <p>Other → Free text</p>                                                                                                                                         | <p>13.2% (81)</p> <p>9.3% (57)</p> <p>69.0% (422)</p> <p>5.4% (33)</p> <p>3.1% (119)</p>                  |
| <p>When your practice contacted you about your Consult Online From Home Service assessment, what were you advised to do?</p> <p>How to look after the problem myself, without contacting the GP practice/other health service</p> <p>Pick up a prescription from the surgery /pharmacy</p> <p>Visit the GP practice for face-to-face at later date</p> <p>Go to A&amp;E department / Walk-in Centre etc</p> <p>Was not contacted</p> <p>Other → Free text</p> | <p>9.1% (56)</p> <p>27.6% (169)</p> <p>40.0% (244)</p> <p>1.5% (9)</p> <p>13.7% (84)</p> <p>8.3% (51)</p> |
| <p>How likely are you to recommend the Consult Online From Home Service to friends and family if they need similar care or advice?</p> <p>Extremely likely</p> <p>Likely</p> <p>Neither likely nor unlikely</p> <p>Unlikely</p> <p>Extremely unlikely</p>                                                                                                                                                                                                     | <p>55.5% (422)</p> <p>25.2% (192)</p> <p>7.2% (55)</p> <p>6.6% (50)</p> <p>5.5% (42)</p>                  |
| <p>Would you use the service again instead of booking a face to face appointment?</p> <p>Yes</p> <p>No</p> <p>Not sure</p>                                                                                                                                                                                                                                                                                                                                    | <p>76.3% (582)</p> <p>8.5% (65)</p> <p>15.2% (116)</p>                                                    |
| <p>Thinking about your use of the Consult Online From Home Service, would you agree or disagree with the statements below</p> <p>The Consult Online From Home Service was easy to use.</p> <p>Strongly agree</p> <p>Agree</p> <p>Neither agree nor disagree</p> <p>Disagree</p> <p>Strongly disagree</p>                                                                                                                                                      | <p>50.7% (383)</p> <p>37.6% (284)</p> <p>5.2% (39)</p> <p>5.2% (39)</p> <p>1.5% (11)</p>                  |



|                                                                                                                             | % (n)       |
|-----------------------------------------------------------------------------------------------------------------------------|-------------|
| Overall, how satisfied or dissatisfied were you with using the Consult Online From Home Service for your health assessment? |             |
| Very satisfied                                                                                                              | 60.3% (459) |
| Fairly satisfied                                                                                                            | 20.4% (155) |
| Neither satisfied nor dissatisfied                                                                                          | 4.3% (33)   |
| Fairly dissatisfied                                                                                                         | 7.4% (56)   |
| Very dissatisfied                                                                                                           | 7.6% (58)   |

### Table C: E-consultation patient survey free text response numbers

Table C summarises the free text questions from the eConsult online patient satisfaction survey, with response numbers.

| E-consultation survey question                                                                                                    | Number of free text responses |
|-----------------------------------------------------------------------------------------------------------------------------------|-------------------------------|
| How did you hear about the Consult Online?                                                                                        | 49                            |
| If the Consult Online service had not been available, what would you have done about your health problem?                         | 37                            |
| Was there a practical reason why you used the Consult Online?                                                                     | 182                           |
| When your practice contacted you about your Consult Online assessment, what were you advised to do?                               | 224                           |
| Did you follow the Consult Online advice? (if answered no, reason why they did not follow advice)                                 | 74                            |
| Did any of our staff make your experience particularly good?                                                                      | 343                           |
| Overall, how satisfied or dissatisfied were you with using the Consult Online Service for your health assessment? Reason for this | 510                           |
| What improvements would you make to the service?                                                                                  | 512                           |

**COREQ Statement****Implementing online consultations in primary care: A mixed method evaluation extending normalisation process theory through service co-production****Domain 1: Research team and reflexivity***Personal Characteristics***1. Interviewer/facilitator. Which author/s conducted the interview or focus group?**

Jon Banks (JB)

Michelle Farr (MF)

(Included as authors, p.1, Title page)

**2. Credentials. What were the researcher's credentials? E.g. PhD, MD.**

JB: BA (WEngland), PhD (Wales), PGdip (Wales)

MF: BSc (Hons), MPhil, PhD, FHEA

(page number not applicable)

**3. Occupation. What was their occupation at the time of the study?**

JB: Research Fellow: Applied Social Science (Qualitative), National Institute for Health Research, Collaborations for Leadership in Applied Health Research and Care West (NIHR CLAHRC West), University of Bristol

MF: Senior Research Associate in Applied Social Science (Qualitative) Research, National Institute for Health Research, Collaborations for Leadership in Applied Health Research and Care West (NIHR CLAHRC West) (institutional affiliations given, p.1)

**4. Gender. Was the researcher male or female?**

JB: Male

MF: Female.

(page number not applicable)

**5. Experience and training. What experience or training did the researcher have?**

JB: Post graduate diploma in social science research methods as part of PhD, experience of collecting and analysing qualitative data with 15 years as a research associate and research fellow.

MF: Extensive training in qualitative research methods (MPhil, PhD), taught qualitative research methods to undergraduates. 12 years' experience conducting qualitative research.

(page number not applicable)

*Relationship with participants***6. Relationship established. Was a relationship established prior to study commencement?**

No relationship was established before the commencement of study (p.5 gives details of how practices and participants were sampled).

**7. Participant knowledge of the interviewer. What did the participants know about the researcher? e.g. personal goals, reasons for doing the research?**

The professional goals of the researchers were to complete the aims and objectives of the study only. The researchers had no personal goals or reasons for doing the research. As part of recruitment and gaining informed consent clinicians were fully informed about the aims and objectives of the study through participant information sheets (p.5).

1 **8. Interviewer characteristics. What characteristics were reported about the interviewer/facilitator? e.g. Bias, assumptions, reasons and interests in the research topic.**

2 The interviewers (JB and MF) were both social scientists.

3 All participants were aware that the interviews were for independent academic research through participant information sheets (p.5).

4 The researchers had no personal interests in the study, it was solely their professional role.

5  
6  
7  
8  
9 **Domain 2: study design**

10 *Theoretical framework*

11 **9. Methodological orientation and Theory. What methodological orientation was stated to underpin the study? e.g. grounded theory, discourse analysis, ethnography, phenomenology, content analysis**

12 In the Background section we explain how we use normalisation process theory and service co-production theory to understand how both patients and staff co-implement and use technology (p.4).

13 In the Methods section we explain how NPT and co-production theory were used to integrate staff and patient perspectives on e-consultations (p.7 Heading: Using NPT and co-production to integrate patient and staff perspectives).

14  
15  
16  
17  
18  
19  
20  
21 *Participant selection*

22 **10. Sampling. How were participants selected? e.g. purposive, convenience, consecutive, snowball.**

23 GP practices were purposively sampled to ensure a range of: locations (rural/suburban/urban); practice levels of deprivation measured by the Index of Multiple Deprivation (IMD) from practice postcodes; and volume of e-consultation usage (calculated by dividing the number of e-consultations received by the number of days the system was live at time of sampling). Six practices were purposively sampled to conduct qualitative interviews. A purposive sample of staff with different professional roles from these six practices involved in the processing or managing of e-consultations were invited to be interviewed via email, with contacts and invitations facilitated by practice managers. Please see Methods section Sampling and Recruitment (p.5) and Table 2.

24  
25  
26  
27  
28  
29  
30  
31  
32  
33 **11. Method of approach. How were participants approached? e.g. face-to-face, telephone, mail, email**

34 Six practices were sampled to be invited to take part in the qualitative research, with six replacements with a similar profile if any of the first six did not want to participate. Practices were initially approached and invited to take part in the research by OneCare staff who were the study collaborators and, as a GP consortium, had direct contact with the practices. OneCare staff phoned practices and emailed them a letter to explain about the research and what getting involved would mean in terms of time and resources. If practices were interested in taking part and wanted to be contacted by the researchers, OneCare staff gave the researchers the practice managers email and telephone number to arrange a discussion about getting involved in the research. Once practice managers had agreed to take part in the research they identified who may be appropriate staff to be interviewed, focusing on those who were involved in the e-consultation system. Practice managers initially approached GPs and administrative staff to ask if they were interested in participating in research interviews. All interviewees were given participant information sheets either via the practice manager, and/ or by researchers. Interviews were organised with different staff via the practice manager. Before interviews commenced, researchers went through the participant information sheet with participants, with further opportunities to ask questions about the research. See Heading: Sampling and recruitment (p.5).

35  
36  
37  
38  
39  
40  
41  
42  
43  
44  
45  
46  
47  
48  
49  
50  
51  
52  
53  
54  
55 **12. Sample size. How many participants were in the study?**

56 We interviewed 23 practice staff. Please see Table 2: Sampled GP practice and interview participant profiles (p.5-6).

**13. Non-participation. How many people refused to participate or dropped out? Reasons**

Two practices did not want to take part, so we invited those reserve practices that had a similar profile to the ones who did not want to take part. Both two reserve practices agreed to take part. Because practice managers spoke to practice staff initially about taking part in interviews (p.5) we do not know how many practice staff declined to take part in an interview, as we only spoke to those who were willing to take part.

*Setting***14. Setting of data collection. Where was the data collected? e.g. home, clinic, workplace**

Interviews took place both face to face within general practice offices (n=20) and over the phone (n=3) (p.6).

**15. Presence of non-participants. Was anyone else present besides the participants and researchers?**

Most interviews took place in private offices, with just the interviewee. However, two of the practice manager interviews and two of the interviews with administrative staff were held in shared office spaces but as this was about work based processes we do not believe that this inhibited the interviews in any way (page number not applicable).

**16. Description of sample. What are the important characteristics of the sample? e.g. demographic data, date.**

Interviews were conducted with 23 practice staff including: 10 GPs, 1 nurse practitioner (NP) (this interviewee is designated with (GP) notation to avoid potential identification), 6 practice managers (PM), 6 'administrators' including an IT manager and receptionists (AD). Please see Table 2: Sampled GP practice and interview participant profiles and Heading: Qualitative interviews and analysis (p.5-6).

*Data collection***17. Interview guide. Were questions, prompts, guides provided by the authors? Was it pilot tested?**

A semi-structured, topic guide was used for all interviews, guided by NPT. This was discussed and agreed with OneCare staff, the research partners (Heading: Qualitative interviews and analysis, p.6).

**18. Repeat interviews.**

We did not conduct repeat interviews (p.5-6 gives the list of interviews and interviewees).

**19. Audio/visual recording. Did the research use audio or visual recording to collect the data?**

Yes audio recording was used through interview data collection, with full informed consent (Heading: Qualitative interviews and analysis, p.6).

**20. Field notes. Were field notes made during and/or after the interview or focus group?**

Yes, some summary notes were made in addition to the voice recorded interviews (page number not applicable).

**21. Duration. What was the duration of the interviews or focus group?**

Interviews lasted between 10-40 minutes (Heading: Qualitative interviews and analysis, p.6).

**22. Data saturation. Was data saturation discussed?**

Data saturation was discussed in research management meetings. Data collection and analysis was conducted in parallel, with participants sampled until data saturation was reached (Heading: Qualitative interviews and analysis, p.6).

1 **23. Transcripts returned. Were transcripts returned to participants for comment and/or**  
2 **correction?**

3 No. We did not feel this was possible to offer in the time available in the study (page number not applicable).  
4

5 **Domain 3: analysis and findings**

6 *Data analysis*

7 **24. Number of data coders. How many data coders coded the data?**

8 Analysis was conducted by two researchers (MF and JB) with a subset double coded to ensure rigour. Key  
9 themes were discussed within the research team to enhance credibility and external validity (Heading:  
10 Qualitative interviews and analysis, p.6).  
11  
12

13 **25. Description of the coding tree. Did authors provide a description of the coding tree?**

14 The coding tree is not included in the manuscript due to word limits (page number not applicable).  
15  
16

17 **26. Derivation of themes. Were themes identified in advance or derived from the data?**

18 Themes were derived inductively from the data. These were then ordered using NPT as a framework (Heading:  
19 Qualitative interviews and analysis, p.6 and Heading: Using NPT and co-production to integrate patient and  
20 staff perspectives, p.7).  
21  
22

23 **27. Software. What software, if applicable, was used to manage the data?**

24 We used NVivo 10 qualitative software package to manage the data (Heading: Qualitative interviews and  
25 analysis, p.6).  
26  
27

28 **28. Participant checking. Did participants provide feedback on the findings?**

29 Participants did not provide feedback on the initial findings. However emerging research themes were  
30 discussed in research management meetings with OneCare, as research collaborators (page number not  
31 applicable).  
32  
33

34 **29. Quotations presented. Were participant quotations presented to illustrate the themes /**  
35 **findings? Was each quotation identified? e.g. participant number**

36 Yes unique participant codes are used alongside quotes, to illustrate findings. The professional roles of the  
37 interviewees were identified within the codes. (Heading: Results, p.8-14)  
38  
39

40 **30. Data and findings consistent. Was there consistency between the data presented and the**  
41 **findings?**

42 Yes (Heading: Results, p.8-14)  
43  
44

45 **31. Clarity of major themes. Were major themes clearly presented in the findings?**

46 Yes (Heading: Results, p.8-14)  
47  
48

49 **32. Clarity of minor themes. Is there a description of diverse cases or discussion of minor**  
50 **themes?**

51 Yes a range of practitioner perspectives are included (Heading: Results, p.8-14). For example, one clinician  
52 who had substantial experience of conducting phone triage, reported that they dealt with most e-  
53 consultations without needing to see patients face-to-face, unless it was for new acute symptoms/ diagnosis.  
54 This potentially suggests that GPs may get more used to this consultation approach over time (p.10).  
55  
56  
57  
58  
59  
60

# BMJ Open

## Implementing online consultations in primary care: A mixed method evaluation extending normalisation process theory through service co-production

|                                 |                                                                                                                                                                                                                                                                                                                                                                                                                                                                                                                                                                                                                                                                                                                                                                                                                                                                                                                                                                                                                                                             |
|---------------------------------|-------------------------------------------------------------------------------------------------------------------------------------------------------------------------------------------------------------------------------------------------------------------------------------------------------------------------------------------------------------------------------------------------------------------------------------------------------------------------------------------------------------------------------------------------------------------------------------------------------------------------------------------------------------------------------------------------------------------------------------------------------------------------------------------------------------------------------------------------------------------------------------------------------------------------------------------------------------------------------------------------------------------------------------------------------------|
| Journal:                        | <i>BMJ Open</i>                                                                                                                                                                                                                                                                                                                                                                                                                                                                                                                                                                                                                                                                                                                                                                                                                                                                                                                                                                                                                                             |
| Manuscript ID                   | bmjopen-2017-019966.R1                                                                                                                                                                                                                                                                                                                                                                                                                                                                                                                                                                                                                                                                                                                                                                                                                                                                                                                                                                                                                                      |
| Article Type:                   | Research                                                                                                                                                                                                                                                                                                                                                                                                                                                                                                                                                                                                                                                                                                                                                                                                                                                                                                                                                                                                                                                    |
| Date Submitted by the Author:   | 12-Dec-2017                                                                                                                                                                                                                                                                                                                                                                                                                                                                                                                                                                                                                                                                                                                                                                                                                                                                                                                                                                                                                                                 |
| Complete List of Authors:       | Farr, Michelle; University of Bristol, Population Health Sciences, Bristol Medical School; NIHR CLAHRC West, University Hospitals Bristol NHS Foundation Trust, 9th Floor, Whitefriars, Lewins Mead<br>Banks, Jonathan; University of Bristol, Population Health Sciences, Bristol Medical School; NIHR CLAHRC West, , University Hospitals Bristol NHS Foundation Trust<br>Edwards, Hannah; University of Bristol, Population Health Sciences, Bristol Medical School; NIHR CLAHRC West, University Hospitals Bristol NHS Foundation Trust<br>Northstone, Kate; University of Bristol, Population Health Sciences, Bristol Medical School; ALSPAC, University of Bristol<br>Bernard, Elly; One Care (BNSSG) Ltd<br>Salisbury, Chris; University of Bristol, Population Health Sciences, Bristol Medical School; NIHR CLAHRC West, University Hospitals Bristol NHS Foundation Trust<br>Horwood, Jeremy; University of Bristol, UK, Population Health Sciences, Bristol Medical School; NIHR CLAHRC West, University Hospitals Bristol NHS Foundation Trust |
| <b>Primary Subject Heading</b>: | General practice / Family practice                                                                                                                                                                                                                                                                                                                                                                                                                                                                                                                                                                                                                                                                                                                                                                                                                                                                                                                                                                                                                          |
| Secondary Subject Heading:      | Health informatics                                                                                                                                                                                                                                                                                                                                                                                                                                                                                                                                                                                                                                                                                                                                                                                                                                                                                                                                                                                                                                          |
| Keywords:                       | Co-production, Telemedicine < BIOTECHNOLOGY & BIOINFORMATICS, PRIMARY CARE, normalisation process theory, online consultations, touchpoints                                                                                                                                                                                                                                                                                                                                                                                                                                                                                                                                                                                                                                                                                                                                                                                                                                                                                                                 |
|                                 |                                                                                                                                                                                                                                                                                                                                                                                                                                                                                                                                                                                                                                                                                                                                                                                                                                                                                                                                                                                                                                                             |

SCHOLARONE™  
Manuscripts

# Implementing online consultations in primary care: A mixed method evaluation extending normalisation process theory through service co-production

## Research article

### Authors

Michelle Farr<sup>1,2</sup> [M.Farr@bristol.ac.uk](mailto:M.Farr@bristol.ac.uk)  
Jon Banks<sup>1,2</sup> [Jon.Banks@bristol.ac.uk](mailto:Jon.Banks@bristol.ac.uk)  
Hannah Edwards<sup>1,2</sup> [Hannah.Edwards@bristol.ac.uk](mailto:Hannah.Edwards@bristol.ac.uk)  
Kate Northstone<sup>1,2</sup> [Kate.Northstone@bristol.ac.uk](mailto:Kate.Northstone@bristol.ac.uk)  
Elly Bernard<sup>3</sup> [elly.bernard@onecare.org.uk](mailto:elly.bernard@onecare.org.uk)  
Chris Salisbury<sup>1,2</sup> [C.Salisbury@bristol.ac.uk](mailto:C.Salisbury@bristol.ac.uk)  
Jeremy Horwood<sup>1,2</sup> [J.Horwood@bristol.ac.uk](mailto:J.Horwood@bristol.ac.uk)

1. Population Health Sciences, Bristol Medical School, University of Bristol, Canynge Hall, 39 Whatley Road, Bristol, BS8 2PS, UK.
2. National Institute for Health Research Collaboration for Leadership in Applied Health Research and Care (NIHR CLAHRC) West at University Hospitals Bristol NHS Foundation Trust, 9th Floor, Whitefriars, Lewins Mead, Bristol, BS1 2NT
3. One Care (BNSSG) Ltd, Unit 4 Osprey Court, Hawkfield Business Park, Whitchurch, Bristol, BS14 0BB.

### Corresponding Author:

Michelle Farr  
NIHR CLAHRC West  
9th Floor Whitefriars  
Lewins Mead  
Bristol BS1 2NT  
[M.Farr@bristol.ac.uk](mailto:M.Farr@bristol.ac.uk)  
0117 342 7279

### Word count:

4,970



## ABSTRACT

**Objectives:** To examine patient and staff views, experiences and acceptability of a UK primary care online consultation system and ask how the system and its implementation may be improved.

**Design:** Mixed method evaluation of a primary care e-consultation system.

**Setting:** Primary care practices in south-west England.

**Methods:** Qualitative interviews with 23 practice staff in 6 practices. Patient survey data for 756 e-consultations from 36 practices, with free text survey comments from 512 patients, were analysed thematically. Anonymised patients' records were abstracted for 485 e-consultations from 8 practices, including consultation types and outcomes. Descriptive statistics were used to analyse quantitative data. Analysis of implementation and usage of the e-consultation system was informed by: (a) normalisation process theory, (b) a framework that illustrates how e-consultations were co-produced, and (c) patients' and staff touchpoints.

**Results:** We found different expectations between patients and staff on how to use e-consultations 'appropriately'. Whilst some patients used the system to try and save time for themselves and their GPs, some used e-consultations when they could not get a timely face-to-face appointment. Most e-consultations resulted in either follow-on phone (32%) or face-to-face appointments (38%) and GPs felt that this duplicated their workload. Patient satisfaction of the system was high, but a minority were dissatisfied with practice communication about their e-consultation.

**Conclusions:** Where both patients and staff interact with technology, it is in effect 'co-implemented'. How patients used e-consultations impacted upon practice staff's experiences and appraisal of the system. Overall, the e-consultation system studied could improve access for some patients, but in its current form, it was not perceived by practices as creating sufficient efficiencies to warrant financial investment. We illustrate how this e-consultation system and its implementation can be improved, through mapping the co-production of e-consultations through touchpoints.

## Keywords

Co-production, e-health, telemedicine, normalisation process theory, online consultations, primary care, touchpoints

## Strengths and limitations of this study

- Largest UK study to date examining staff and patient experiences of using a primary care online consultation system.



- Extending normalisation process theory with service co-production theory enables an in-depth understanding of how patients and staff interacted with the e-consultation system.
- Touchpoint analysis enables improvements to be suggested to develop the design and implementation of online consultation systems, aimed at software designers, policymakers and general practices interested in this technology.
- This observational study was based on a pilot period of one online consultation system; and issues highlighted may be due to the system studied, rather than all online consultation systems.

## BACKGROUND

English general practice clinical workload has risen by 16% over the period 2007-14.<sup>1</sup> 93% of general practitioners (GPs) say their workload has negatively impacted on quality of care given to patients.<sup>2</sup> Average waiting times for an appointment have been reported as just under 13 days.<sup>3</sup>

Internationally, policymakers are advocating technological alternatives to face-to-face primary care consultations to improve service quality.<sup>4</sup> UK policy to improve primary care access includes the Prime Minister's Challenge Fund (now the GP Access Fund),<sup>5</sup> and the General Practice Forward View.<sup>6</sup> These promote greater use of technology to manage workload and improve patient access, with £45 million made available to support the implementation of online consultation systems.<sup>7</sup> Online or e-consultations enable patients to contact their GP via a mobile app or online portal.<sup>7</sup> General practice staff attitudes toward electronically based consultations include concerns about medico-legal issues, clinical limitations and increasing workload concerns.<sup>8-10</sup> Research into practitioners' and patients' actual experiences of e-consultations is limited, but timely, as implementation is at an early stage.<sup>4 10</sup>

A consortium of general practices in south west England [One Care],<sup>11</sup> received funding through the GP Access Fund,<sup>5</sup> to pilot online consultations. Starting in April 2015, the eConsult system<sup>12</sup> (previously called WebGP) was implemented free of charge into 36 general practices. The eConsult system was designed by GPs, software programmers and operational managers, with support from medical defence organisations.<sup>13</sup> Patients access the eConsult system (referred to as 'the system' in this paper) via their own GP practice website. They can access self-help, pharmacy advice, 111 (NHS non-emergency telephone advice), administrative help (such as repeat prescriptions), or submit an online form with details of their condition, electronically sending this to their GP practice, where it is then processed. If the system identifies signs or symptoms that may require immediate medical attention, patients are redirected to appropriate services, otherwise the system informs patients that their GP practice will contact them by the end of the next working day.

1  
2  
3 Normalisation process theory (NPT) illustrates issues to address when implementing a technology or  
4 complex intervention (Figure 1).<sup>14-16</sup>  
5  
6

### 7 **Figure 1: NPT constructs in association with the implementation of e-consultations**

8  
9 Patients' perspectives of implementing technology have been researched less;<sup>17</sup> and NPT may need  
10 to be developed to account for patients' implementation roles.<sup>18-21</sup> With e-consultations patients  
11 input details of their symptoms, which produces the e-consultation that the practice then processes.  
12 In this way, an e-consultation is co-produced; both patients and staff are integral to the process. This  
13 article examines 'co-production in the implementation of core services' where 'citizens are actively  
14 engaged in the implementation, but not the design, of an individual service'<sup>22</sup> (p.433). We develop  
15 NPT to analyse patients' implementation roles, using service co-production theory<sup>22-29</sup> to understand  
16 how both patients and staff co-implement and use technology.  
17  
18  
19  
20  
21

22 We undertook an evaluation of eConsult to analyse patient usage, acceptability, effectiveness and  
23 costs of implementing the system in the 36 general practices, incorporating a quantitative,  
24 qualitative and economic analysis. The quantitative and economic analysis on usage and costs<sup>30</sup> and  
25 interviews with practice staff about e-consultations<sup>31</sup> are reported separately. This article analyses  
26 the implementation and acceptability of the eConsult system from patient and staff perspectives,  
27 using normalisation process theory (NPT)<sup>14</sup> and service co-production theory<sup>22-29</sup> to understand their  
28 experiences and how the e-consultation system and its implementation may be improved.  
29  
30  
31  
32  
33

## 34 **METHODS**

### 35 **Research design**

36 Data was collected that covered up to 15 months usage of the system by GP practices, and consisted  
37 of three components:  
38  
39  
40

- 41 1. Qualitative interviews with staff from a sample of 6 GP practices
- 42 2. Quantitative data from electronic medical records for patients who had conducted an e-  
43 consultation from a sample of 8 GP practices
- 44 3. Quantitative and qualitative patient survey data from patients who had conducted an e-  
45 consultation about their experiences of e-consultations from all 36 GP practices.  
46  
47  
48  
49

### 50 **Sampling and recruitment**

51 To conduct qualitative staff interviews and collect anonymised patient record data, GP practices  
52 were purposively sampled to ensure a range of: locations (rural/suburban/urban); practice levels of  
53 deprivation measured by the Index of Multiple Deprivation (IMD) from practice postcodes; and  
54  
55  
56  
57  
58  
59  
60

1  
2  
3 volume of e-consultation usage (calculated by dividing the number of e-consultations received by  
4 the number of days the system was live at time of sampling). Table 1 illustrates the range of  
5 practices recruited, with details of the eight practices purposively sampled to collect anonymised  
6 patient medical record data from e-consultations, and the six practices purposively sampled to  
7 conduct qualitative interviews. A purposive sample of staff with different professional roles from  
8 these six practices involved in the processing or managing of e-consultations were invited to be  
9 interviewed via email with participant information sheets, with contacts and invitations facilitated by  
10 practice managers. Practice protocols on using the system were also given to the researchers where  
11 they were available.  
12  
13  
14  
15  
16  
17

18 **Table 1: Sampled GP practice and interview participant profiles**

| GP Practice | E-consultations per day live (range 0.1-2.9 for 36 practices) | IMD deciles of deprivation <sup>32</sup> (lower decile=more deprived) | Area     | % ethnic minority population | Staff interviews        | Number of e-consultations randomly sampled from electronic patient record data |
|-------------|---------------------------------------------------------------|-----------------------------------------------------------------------|----------|------------------------------|-------------------------|--------------------------------------------------------------------------------|
| 1           | 2.9                                                           | 5                                                                     | Urban    | 17.5–20%                     | 2 GPs, 1 AD, 1 PM       | 64                                                                             |
| 2           | 0.9                                                           | 10                                                                    | Rural    | 0–2.5%                       | 2 GPs, 2 AD, 1 PM       | 60                                                                             |
| 3           | 1.6                                                           | 1                                                                     | Urban    | 35–37.5%                     | 2 GPs, 1 AD, 1 PM       | 70                                                                             |
| 4           | 0.2                                                           | 1                                                                     | Urban    | 7.5-10%                      | 1 GP, 1 AD, 1 PM        | 0                                                                              |
| 5           | 0.7                                                           | 3                                                                     | Urban    | 5-7.5%                       | 1 GP, 1 PM              | 38                                                                             |
| 6           | 0.8                                                           | 8                                                                     | Urban    | 10-12.5%                     | 2 GPs, 1 NP, 1 AD, 1 PM | 0                                                                              |
| 7           | 2.2                                                           | 5                                                                     | Urban    | 12.5-15%                     | 0                       | 60                                                                             |
| 8           | 1.2                                                           | 9                                                                     | Suburban | 7.5-10%                      | 0                       | 60                                                                             |
| 9           | 0.6                                                           | 10                                                                    | Urban    | 7.5-10%                      | 0                       | 66                                                                             |
| 10          | 1.5                                                           | 9                                                                     | Urban    | 7.5-10%                      | 0                       | 67                                                                             |

### 49 Qualitative interviews and analysis

50 Interviews were conducted with 23 practice staff including: 10 GPs, 1 nurse practitioner (NP) (this  
51 interviewee is designated with (GP) notation to avoid potential identification), 6 practice managers  
52 (PM), and 6 'administrators' including an IT manager and receptionists (AD) (see Table 1). Interviews  
53 took place both face to face within general practice private offices (n=20) and over the phone (n=3),  
54  
55  
56  
57

1  
2  
3 and lasted between 10-40 minutes. All participants gave full informed consent. Interviews were  
4 semi-structured, using a topic guide that had been developed with reference to NPT<sup>14</sup> covering: (i)  
5 introduction of e-consultations into the practice; views, promotion, training needed, (ii) e-  
6 consultation processing, (iii) impact on workload, (iv) impact on clinical practice, and (v) attitudes to  
7 future implementation. All interviews were audio recorded, transcribed, anonymised, checked for  
8 accuracy and imported into NVivo 10 software to aid analysis. Inductive thematic analysis was used  
9 grounded in the data,<sup>33</sup> NPT was then used as a framework to order the codes. Analysis was  
10 conducted by two researchers (MF and JB) with a subset double coded to ensure rigour. Data  
11 collection and analysis was conducted in parallel, with participants sampled until data saturation was  
12 reached. Key analytic themes were discussed within the research team to enhance credibility and  
13 external validity.

### 20 21 **Patient record data**

22 Electronic anonymised patient record data were collected from a random sample of patients (n=485)  
23 who had used e-consultations from eight of the participating practices (Table 1), between April 2015  
24 to June 2016. A staff member from a participating practice retrospectively extracted anonymised  
25 patient data from patient records onto an Excel database from all practices, including: patient  
26 demographics; reason for contact; the actions taken resulting from the e-consultation (e.g.  
27 telephone call, face-to-face appointment, email advice); and further care provided by the practice in  
28 the next 30 days in relation to the e-consultation (e.g. treatment room tests, nurse appointments,  
29 further GP consultations etc.). When analysing practice responses to e-consultations, the primary  
30 response was designated as the most resource-intensive action (i.e. a face to face appointment is  
31 more resource intensive than a phone appointment than a prescription), and the secondary action  
32 was the next most resource intensive (i.e. a prescription or advice) to account for multiple e-  
33 consultation processes.<sup>30</sup> The primary clinical reason for patients using an e-consultation was cross  
34 tabulated with the primary response to the e-consultation from practice staff using descriptive  
35 statistics.

### 44 45 **Patient survey data**

46 Patient survey data were routinely collated by the e-consultation software company [Hurley], using  
47 their own survey design. Patients who opted in were sent a questionnaire seven days after the  
48 submission of their e-consultation. This contained both tick box questions and free text. We were  
49 given access to this anonymised data from the software company for the 36 pilot GP practices from  
50 April 2015 to June 2016. The tick box questions were analysed using descriptive statistics  
51 (Supplementary file, Table A). Free text comments were coded using inductive thematic analysis  
52  
53  
54  
55  
56  
57  
58  
59

grounded in the data,<sup>33</sup> NPT was then used as a framework to order the codes. Answers were analysed by two researchers (MF and JB), with a subset double coded. Patient survey quotes are labelled P01, P02... in the following data analysis. From 7,472 e-consultations, a total of 751 patients (10%) submitted a survey with quantitative data, and additional comments to individual questions ranged from 38 to 512 patients (Supplementary file, Tables A-B). Qualitative patient survey data was used to facilitate interpretation of the quantitative patient survey responses.

## Theoretical integration of patient and staff data using NPT and co-production theory

Service co-production theory and NPT were theoretically integrated to examine not only implementation from staff and patient's points of view, but also the processes and interactions between patients and staff when using the e-consultation system. Service co-production can be understood as a process where service quality is shaped by (a) people's initial *expectations* of a service (b) staff and service users' *roles, interactions and experiences* within a service, leading to (c) their *resulting satisfaction or dissatisfaction*.<sup>23 29 34</sup> Understanding this process helps to analyse service users' roles as a co-producer of a service.<sup>26 35</sup> NPT constructs<sup>14 16</sup> and service co-production processes<sup>23</sup> can be integrated together and used to analyse staff and patients' initial expectations, interactions with and experiences of e-consultations, and their subsequent perceptions resulting in satisfaction/ dissatisfaction (Figure 2).

### Figure 2: Combining NPT framework with service co-production processes

Patient survey data (quantitative and qualitative), staff interview data and patient record data were theoretically integrated,<sup>36</sup> bringing different findings together into this theoretically-informed framework (Figure 2). The NPT concepts of *coherence* and *cognitive participation* were analysed using staff interviews and patients' survey responses. *Coherence* explored staff and patients' expectations of the system and how the system's purpose and possibilities were understood. *Cognitive participation* explored the relational work that promoted engagement with e-consultations. *Collective action* explored how the system was operationalised. Initially an e-consultation workflow process map for each practice was developed from staff interviews and practice protocols on using the system. These were integrated to illustrate core practice processes. 'Touchpoints' (points of contact and interaction through a service process) were identified by using service blueprint techniques to map the e-consultation process.<sup>25 37</sup> Service blueprints are maps of service systems that illustrate service user and staff roles, actions and interactions, and can illustrate how service users expectations and experiences affects service quality.<sup>25 37</sup> Using staff interviews of the e-consultation process, and qualitative patient survey responses, three 'touchpoints'<sup>25 35</sup> were

1  
2  
3 identified, where patients and staff interacted through the e-consultation process. Touchpoints have  
4 been used in co-production literature<sup>25 35</sup> and health service improvement methods such as  
5 experience based co-design.<sup>38-40</sup> Here they were used as an analytic lens to examine the operational  
6 work and experiences of both staff and patients through an e-consultation. Key touchpoints are  
7 illustrated in Figure 3 and analysed in the *Collective action* results section.  
8  
9

10  
11 *Reflexive monitoring* explored staff and patient appraisal of the system, analysing when e-  
12 consultations may work for whom. Patients' clinical reasons for using an e-consultation and practice  
13 staff responses from patient record data (Table 2) were integrated with the analysis of qualitative  
14 staff and patients' comments about their satisfaction with the system, integrating all data sets. This  
15 integration of qualitative and quantitative data used established 'following a thread'<sup>36</sup> techniques  
16 where the question of why staff and patients were satisfied/ dissatisfied with the system, was traced  
17 using all data sets, to understand patients and staff sources of satisfaction/dissatisfaction with the  
18 system.  
19  
20  
21  
22  
23

## 24 25 RESULTS

26 The results are presented using the four NPT concepts, as detailed above.

### 27 28 Coherence

29 Coherence describes patients' and staff understandings and expectations of the system's purpose. E-  
30 consultations were seen by practice staff as a new way of working that had the potential to reduce  
31 GP workload pressures:  
32  
33  
34

35  
36 *We are massively overstretched ... So, that was one of the reasons why I wanted [eConsult],*  
37 *was so that we could make it easier... to deal with queries and often relatively simple queries*  
38 *that come through (PM23).*  
39  
40

41 Practices were aware of the difficulties patients faced in securing GP appointments and e-  
42 consultations were seen to provide a different pathway to care and advice. The pilot provided  
43 practice managers with an opportunity to test out the system without financial investment.  
44  
45

46 Patients saw e-consultations as a new, alternative way to communicate with their practice, that  
47 could be used out of surgery hours, *'It is quick and easy to use at a time to suit myself. Saves having*  
48 *to call the surgery'* (P61). Several patients' comments exhibited an understanding of the pressures  
49 that practices were under: *'It saves the GP time, saves me coming to the practice, great all round'*  
50 (P81).  
51  
52  
53  
54  
55  
56  
57  
58  
59  
60

## Cognitive participation

Cognitive participation describes the relational work that people were involved in to promote participation with the system. Implementing e-consultations within practices was reported by practice staff as a relatively straight forward process, with little training needed. However, there were varying feelings toward it:

*We were quite happy to do it (AD08).*

*I was feeling very anxious about the extra workload ... some things feel like a bottomless pit (GP22).*

Few practices reported involving patients in implementing e-consultations, one practice mentioned their patient participation group were concerned the system may disadvantage those who were less able to use technology. Practices employed different promotion methods to patients to varying degrees including through their website, waiting room banners, leaflets, social media, on phone answering messages, and newsletters. In some practices, there was a feeling that there was not as much uptake of the system as expected.

Some patients were activated to use the system because they couldn't get an appointment: *'No available appointment for 2 weeks'* (P10); *'Tried Switchboard nine times ... Went online'* (P05). Others favoured the online format and remote consultation style, they used the system as it was difficult to visit the practice due to disabilities, illness or working commitments, or saw it was a more legitimate way to access GP advice: *'didn't want to waste Drs time with a full consultation which I didn't need'* (P171).

## Collective action

*Collective action* describes how the system was operationalised in practice by patients and staff. Figure 3 maps where staff and patients interacted through an e-consultation process, identifying three touchpoints, key interactions and experiences through the co-production of an e-consultation.

### Figure 3: E-consultation process map highlighting key touchpoints

#### Touchpoint 1: Patient interaction with e-consultation system

Touchpoint 1 in Figure 3 relates to patients' initial decision to complete an e-consultation form, and their interaction with the system. Over the 15 month pilot period, 7,472 patients completed an 'e-consultation', most frequently on weekdays and during traditional working hours.<sup>30</sup> Patient record data shows that women used e-consultations more than men (64.7% versus 35.3%) and 53.4% were



1  
2  
3 between 25-44 years old.<sup>30</sup> Most commonly, patients submitted administrative requests e.g. repeat  
4 prescriptions, test results and letters (22.5%), followed by immunological/ infection issues (14.4%)  
5 (see Table 2 and Edwards et al.<sup>30</sup>). Most patient survey respondents agreed that the system was easy  
6 to use (Supplementary file, Table A): *'had no problems at all'* (P398). It was *'helpful to be able to*  
7 *contact about minor requests'* (P475). Some patients preferred the written interface over a verbal  
8 conversation: *'Allowed me time to describe symptoms in greater detail than talking'* (P279).  
9 However, patients reported that the system did not seem to account for multiple conditions.  
10  
11

#### 12 Touchpoint 2: GP Practice processing of e-consultations

13  
14 During the pilot, the system was not integrated with the patient record IT system [EMIS] that  
15 practices used. Administrators downloaded patients' e-consultations from the system and printed  
16 them or manually imported them into patients' records. Some administrators spoke of conducting  
17 some triage e.g. directing hay fever queries to pharmacy. Clinicians described variability in the  
18 quality of information from the e-consultation forms. Whilst information could be: *'clear and*  
19 *concise'* (GP13), this was not always the case:  
20  
21  
22  
23  
24

25  
26  
27 *One patient needed to be admitted [to hospital] ... Because the symptoms weren't very clear*  
28 *(GP05).*  
29  
30

31  
32 Most GPs often reverted to face to face or phone conversations to gain more information to conduct  
33 clinical decision-making.<sup>30 31</sup> One clinician who had substantial experience of conducting phone  
34 triage, reported that they dealt with most e-consultations without needing to see patients face-to-  
35 face, unless it was for new acute symptoms/ diagnosis.  
36  
37  
38

#### 39 Touchpoint 3: GP Practice interaction with patients following their e-consultation

40 Practices organised follow-up appointments in different ways. In some, a face to face appointment  
41 might have to *'start from scratch'* (GP05), because a different clinician originally dealt with the e-  
42 consultation:  
43  
44  
45

46  
47 *I had to repeat everything I entered on line. What's the point in asking if you're not going to*  
48 *read it? (P90)*  
49

50 Other practices had more continuity where GPs could follow through the e-consultation, which  
51 provided benefits to the consultation:  
52  
53

54 *The actual face to face consultation is then quicker, and that's quite nice in some ways ...it*  
55 *doesn't open up other avenues, to a degree, okay, so it's more efficient (GP18)*  
56  
57  
58



Reception staff usually contacted patients via a practice email address or phone, to relay a message from a GP to patients, or to arrange the next step or outcome of their e-consultation. Occasionally, patients who had had no opportunity to speak to a doctor, were unhappy about this: '*I had no opportunity to ask any questions*' (P44). Some patients reported missing practice phone calls, one spoke of '*telephone answer machine ping-pong*' (P275). 14% of survey respondents reported not being contacted at all following their e-consultation (surveys were sent seven days after an e-consultation submission) which left patients dissatisfied (Supplementary file, Table A):

*I feel like my treatment has been compromised and delayed as a result of this service* (P48)

The system had an in-built function to electronically respond to a patient's email address; however only one out of six practices where interviews were conducted said they used this, and not all staff could access the system.

Table 2 cross tabulates the primary clinical reason for patients using an e-consultation with the primary response to the e-consultation from practice staff. GP responses varied with patients' health queries e.g. medication queries and advice resulted in no face-to-face appointments, whilst 54% of neurological queries resulted in face-to-face appointments.

**Table 2: Primary response from practice staff by reason for e-consultation (from patient record data)**

| Patient reason for consulting | Total number (%) | GP practice staff response to e-consultation |               |              |          |              |               |        |               |
|-------------------------------|------------------|----------------------------------------------|---------------|--------------|----------|--------------|---------------|--------|---------------|
|                               |                  | Face to face                                 | Phone consult | Prescription | Fit note | Test request | Refer routine | Advice | Other/unknown |
| Musculoskeletal / limb pain   | 60 (12.4%)       | 48.3%                                        | 38.3%         | 1.7%         | 0        | 1.7%         | 3.3%          | 1.7%   | 0             |
| Infection/ Immunological      | 70 (14.4%)       | 40.0%                                        | 41.4%         | 8.6%         | 0        | 0            | 0             | 0      | 0             |
| Neurological                  | 26 (5.4%)        | 53.9%                                        | 26.9%         | 0            | 0        | 3.9%         | 0             | 0      | 3.9%          |
| Sexual/Reproductive health    | 41 (8.5%)        | 39.0%                                        | 41.5%         | 7.3%         | 0        | 4.9%         | 0             | 0      | 2.4%          |
| Dermatological                | 33 (6.8%)        | 48.5%                                        | 21.2%         | 18.2%        | 0        | 0            | 0             | 3.0%   | 0             |
| Respiratory                   | 25 (5.1%)        | 52.0%                                        | 24.0%         | 4.0%         | 0        | 0            | 0             | 0      | 8.0%          |
| Mental health                 | 29 (5.9%)        | 44.8%                                        | 34.5%         | 10.3%        | 0        | 0            | 0             | 0      | 0             |
| Digestive                     | 19 (3.9%)        | 52.6%                                        | 26.3%         | 5.3%         | 0        | 0            | 0             | 0      | 5.3%          |

|                                   |                   |              |              |             |             |             |             |             |             |
|-----------------------------------|-------------------|--------------|--------------|-------------|-------------|-------------|-------------|-------------|-------------|
| <b>Medication query/advice</b>    | 19 (3.9%)         | 0            | 73.7%        | 10.5%       | 0           | 0           | 0           | 0           | 5.3%        |
| <b>Administrative<sup>a</sup></b> | 109 (22.5%)       | 12.2%        | 27.1%        | 11.2%       | 14.0%       | 1.9%        | 5.6%        | 10.3%       | 7.5%        |
| <b>Other / Unclear</b>            | 54 (11.1%)        | 38.4%        | 17.0%        | 0           | 0           | 3.8%        | 0           | 5.7%        | 1.9%        |
| <b>Total</b>                      | <b>485 (100%)</b> | <b>38.1%</b> | <b>32.1%</b> | <b>7.2%</b> | <b>3.1%</b> | <b>1.6%</b> | <b>1.6%</b> | <b>9.1%</b> | <b>6.4%</b> |

<sup>a</sup> fit notes, test results, referrals, repeat scripts, letter requests, booking appointments

Patient record data in Table 2 illustrates that overall, 38% of e-consultations resulted in a primary response of a face to face consultation.<sup>30</sup> Several patients commented that they had received easier access to a face to face appointment through the system:

*The service recommended immediate attention that resulted in a quicker appointment than otherwise would have been the case (P313)*

Whilst a face to face consultation often satisfied patients, it could potentially duplicate GP workload,<sup>31</sup> with initial e-consultation processing by administrators and a GP, plus an appointment space. 32% of e-consultations resulted in a primary response of a phone consultation. Where e-consultations resulted in a primary response of a prescription (7.2%), a 'fit note' statement of fitness for work (3.1%), test or treatment request (1.6%), referral (1.6%) or advice (9.1%) (occurring in 23% of patient e-consultation records),<sup>30</sup> these could save GP time as administrative staff relayed messages and there was no direct contact between the patient and GP.

*It helps in terms of administratively if there are things which can be done very simply, and that can free up, that can free up surgery time, to a degree (GP18).*

### **Reflexive monitoring: Who do e-consultations work for, and when?**

*Reflexive monitoring* describes how patients and staff appraised the system and their resulting satisfaction/ dissatisfaction. All data sets are integrated to explore when e-consultations were likely to work best for whom.

Patients' satisfaction with the system was high and most (81%) were likely to recommend the system to others. 76% said they would use the service again instead of booking a face to face appointment (Supplementary file, Table A). Dissatisfaction with the system was usually a result of: lack of interaction with a GP; missed communications; thinking that their query could be answered remotely, and then being asked to book an appointment; or lack of timely follow-up of their e-consultation. Several patients suggested improvements (at touchpoint 1) that have since been integrated into the system by the software developers e.g. allowing patients to consult with multiple symptoms for both new and existing conditions; the ability to upload photos; being able to nominate

a preferred GP; simplification of language;<sup>41</sup> and an administration channel for requests such as a fit note or test results.

Interviews revealed that clinical staff were less satisfied with the system, as time saved in completing e-consultations without further GP-patient communication (23%), was counterbalanced by e-consultation processing and GPs needing to phone or see patients in 70% of e-consultations, which could duplicate GP work.<sup>31</sup> Analysing why patients were e-consulting and the resulting action (Table 2), and combining this with staff and patients' appraisal of the system, Table 3 summarises when e-consultations were likely to work and be effective for patients and GPs. For GPs, it was only for relatively straightforward queries that the system could save substantial time. Patients were satisfied more often as e-consultations could: save them time, get them a quicker appointment, provide an easier access route to GP services, or they preferred the remote access format.

**Table 3: Nature of e-consultations and the resulting possible satisfaction and dissatisfaction of staff and patients**

| Nature of query                                                             | Patients' satisfaction                                | Practice staff satisfaction                                           |
|-----------------------------------------------------------------------------|-------------------------------------------------------|-----------------------------------------------------------------------|
| Administrative queries                                                      | ✓<br>Most processed remotely                          | ✓<br>Most processed remotely                                          |
| Medication queries and simple queries about pre-existing patient conditions | ✓<br>Most processed remotely by phone or prescription | ✓<br>Most processed remotely by phone or prescription                 |
| Queries about new conditions                                                | ✓<br>May get quicker response                         | X<br>Face to face appointment more likely - possible work duplication |
| Complex questions, multiple symptoms                                        | ✓<br>May get quicker response                         | X<br>Face to face appointment more likely - possible work duplication |

Practice suggestions for system improvement (at touchpoint 1) included that patients could be signposted away from consulting a GP more often, to encourage more self-help or use of pharmacy when 'appropriate' (AD11), to 'make people aware that they're in some cases wasting GP's time' (AD04). Some practice staff suggested that patients might be guided to use e-consultations under certain conditions where only remote GP input was likely to be needed (as in Table 3). In contrast, if a patient had multiple symptoms for a new condition for which a face to face appointment was likely to be needed, GPs suggested that a modified system could flag this, directing patients not to submit

an e-consultation but to directly book a face to face appointment, to avoid GP work duplication. Some practice staff were also concerned that the system might exacerbate inequalities of access for people with literacy difficulties or whose first language is not English, and those with difficulties in using a computer or mobile device.

Comparatively analysing different practice processing of e-consultations (touchpoint 2) suggests that administrative allocation of e-consultations to GPs could affect process efficiency. If administrators allocated e-consultations to a GP who had previously seen the patient (especially about similar symptoms/ conditions) this may support more efficient processing, as GPs would be more familiar with the patient and condition:

*We like to look at each patient's notes to find out which doctor perhaps has seen this patient for that particular problem and then we would know where to direct that e-consultation*  
(AD09)

Administrators could also book face to face or phone consultations with the GP who had processed the e-consultation and was familiar with the patient query. This could focus the appointment, and avoid situations where patients felt that GPs appeared not to have read their e-consultation.

Improvements at touchpoint 3 (practice interaction with patients about e-consultations) include more robust practice communication mechanisms to reduce patient dissatisfaction about practice communication relating to their e-consultation. This could be supported by integration with electronic practice IT systems,<sup>17</sup> and further use of electronic communications back to patients that more staff can access and use.

Summarising this touchpoint analysis, highlights potential improvements to the system and its implementation (Table 4).

**Table 4: Suggested improvements to implement the e-consultation system**

| Issues identified with Touchpoint 1: Patient decides to fill in an e-consultation form                                                                                                                                                                                                                                                   | Suggested technological improvements                                                                           |
|------------------------------------------------------------------------------------------------------------------------------------------------------------------------------------------------------------------------------------------------------------------------------------------------------------------------------------------|----------------------------------------------------------------------------------------------------------------|
| Patients suggested several ways to improve system usability, such as: allowing patients to consult with multiple symptoms for both new and existing conditions; the ability to upload photos; being able to nominate a preferred GP; simplifying language, and an administration channel for requests such as a fit note or test results | Software developers have implemented these improvements to the system in its ongoing development <sup>41</sup> |
| Practice staff suggested that the system could                                                                                                                                                                                                                                                                                           | Better signposting to pharmacy and self-help                                                                   |

|                                                                                                                         |                                                                                                                                                                                                                                                                               |
|-------------------------------------------------------------------------------------------------------------------------|-------------------------------------------------------------------------------------------------------------------------------------------------------------------------------------------------------------------------------------------------------------------------------|
| encourage more use of pharmacy or self-help options where appropriate                                                   | options on website interface                                                                                                                                                                                                                                                  |
| Promoting patients to use e-consultations for simple conditions and questions to save face to face appointments         | Appropriate patient signposting on when to complete an e-consultation                                                                                                                                                                                                         |
| Reducing patient e-consultation usage when they need a diagnosis about new, complex and multiple symptoms               | Appropriate patient signposting on when not to complete an e-consultation but to directly book a face to face appointment to save practice staff work duplication                                                                                                             |
| Reducing the use of the e-consultation system to directly access face-to-face appointments                              | Signposting to discourage patient use of the system if they want a face-to-face appointment                                                                                                                                                                                   |
| <b>Issues identified with Touchpoint 2: Practice processing of e-consultations</b>                                      | <b>Suggested practice implementation improvements</b>                                                                                                                                                                                                                         |
| Some GPs received e-consultations that could have been dealt with by a pharmacy                                         | Administrative triage where appropriate e.g. directing hay fever queries to pharmacy, to save GP time                                                                                                                                                                         |
| Supporting more efficient processing of e-consultations, and potentially reduce follow-on face-to-face consultations    | Allocate e-consultations to GPs who are familiar with the patient and their symptoms, where appropriate                                                                                                                                                                       |
| <b>Issues identified with Touchpoint 3: Practice interaction with patients about e-consultations</b>                    | <b>Suggested improvements</b>                                                                                                                                                                                                                                                 |
| Patient complaints that they had to repeat information in consultation as GPs appeared not to have read e-consultations | Allocate follow-on phone and face-to-face appointments to GPs who initially process e-consultations                                                                                                                                                                           |
| Patients missing or not receiving communication back from the practice about their e-consultation                       | More robust internal practice systems to ensure that patients receive communication back about their e-consultations<br>Stronger e-consultation and practice IT integration to support electronic communications back to patients that more practice staff can access and use |

None of the 36 practices took up the system after the pilot, which would have involved paying market prices for the software. However, 13 practices were interested in continuing to use the system if costs were paid for by alternative funding sources, and technological interoperability with electronic patient record systems was further developed.

## DISCUSSION

### Key findings

Practices were originally interested in the system to improve access and create efficiencies. Whilst some patients used the system to try and save time for both themselves and their GPs, other patients were activated to use e-consultations when they could not get a timely appointment. Because practices were dependent upon patients deciding how and when to use e-consultations, clearer guidance may be needed for patients to support more efficient use of e-consultations (see Table 4, touchpoint 1).

Our findings highlight the difficulties in substituting real time interaction with an asynchronous technological interface (touchpoints 2 and 3). This could reduce professionals' ability to use tacit knowledge of patients concerns, patients' ability to negotiate treatment options and shared decision-making. GPs often needed further information when processing e-consultations, leading to face-to-face and phone consultations, which could duplicate workload. However, the system was being piloted, which meant that GPs were developing their skills in e-consultations, so phone and face-to-face consultations may decrease over time. GPs speculative fears about the perceived risks to patients of online consultations and the potential increases in workload<sup>2 10</sup> are to some extent causally linked through this study. For more efficient implementation of e-consultations, further consideration may be needed of when it is appropriate to use technology e.g. for less complex tasks,<sup>9</sup> and when face-to-face interaction is essential, such as in the diagnosis of complex symptoms<sup>42</sup>

Other interventions designed to improve efficiency and access in primary care highlight potential workload issues; e.g. nurse-led telephone triage may reduce GP contact time, but increase overall clinician contact time.<sup>43</sup> Previous e-health studies that use NPT highlight barriers of adverse effects on workload<sup>44</sup> and poor interactional workability of technology which can impede adoption within primary care.<sup>45</sup> E-consultations supported efficiencies for straightforward GP queries, but less so complex ones, showing that how patients use technology can affect its implementation.<sup>46</sup> Our results align with other studies that highlight potential barriers to technological implementation including that: the clinical data the system was designed to generate from patients was sometimes incomplete;<sup>47</sup> the system was not fully interoperable with other IT systems, and costs prohibited long-term usage.<sup>17</sup>

### NPT and service co-production theory

Service co-production theory and touchpoints can extend NPT through focussing on how technologies change the service process and interactions between patients and staff. Whilst

1  
2  
3 involving patients voluntarily in co-designing technology may improve e-health technology;<sup>17 40</sup> this  
4 paper's contribution illustrates how service co-production theory can support the analysis of how  
5 patients co-implement technology through everyday service interactions, rather than voluntarily  
6 being involved in co-designing a service. Service co-production particularly extends the *collective*  
7 *action* aspects of NPT, exploring in-depth how both staff and patients operationalise and relate  
8 through a service system. Touchpoint analysis illustrates how patients and staff responded to digital  
9 prompts and interacted through the e-consultation process. This fills a research gap to specifically  
10 examine how e-health services affect clinical interactions with patients.<sup>44 46</sup> It shows how e-health  
11 implementation may be reconfigured through staff and service user produced knowledge<sup>44</sup> to  
12 improve technology and its implementation. This may tackle barriers to technological adoption, such  
13 as understanding how technology impacts care delivery, relationships between care givers and  
14 receivers, the role of patients in implementation, and how to maintain and improve ongoing  
15 implementation.<sup>17 46</sup>

### 23 **Policy and practice implications**

24  
25 Technology is often promoted to improve NHS efficiency,<sup>48</sup> but benefits are often more limited due  
26 to implementation difficulties.<sup>17</sup> In this study, no practices experienced sufficient workload savings  
27 to warrant practices own financial investment in the system at current market prices, however the  
28 system did improve access for some patient groups. NHS England has offered financial support for  
29 practices to adopt online consultations.<sup>6</sup> Our research affirms that clear implementation guidance is  
30 needed<sup>49</sup> and provides recommendations to support the technological developments of e-  
31 consultations and future implementation to alleviate additional GP workload whilst improving  
32 patient access. NHS England case studies of e-consultation systems include their potential role to  
33 triage most patients.<sup>50 51</sup> Whilst our study gave no statistical evidence that patient socioeconomic  
34 factors affected usage rates,<sup>30</sup> practitioners in our qualitative study had concerns about the system's  
35 potential impact on equality of access. Further research is needed to investigate equity of access  
36 when implementing e-consultations.

### 43 **Strengths and limitations**

44  
45 This study is one of the largest UK pilot independent evaluations of e-consultation systems to date,  
46 covering a wide range of GP practices. The broad sample of practice staff interviewed, combined  
47 with patient record data and patient survey data allows a comprehensive insight into the e-  
48 consultation system. Patients' qualitative survey comments varied in depth, but provided a wide  
49 breadth of responses, e.g. 510 respondents explained reasons for satisfaction/ dissatisfaction with  
50 the system. An early internal research report shared with the e-consultation software developers,  
51  
52  
53  
54  
55  
56  
57  
58  
59

1  
2  
3 has supported improvements to the e-consultation system studied.<sup>41</sup> Theoretically, combining NPT  
4 and co-production theory has enabled the integration of staff's and patients' perspectives; and  
5 touchpoint analysis has suggested further improvements that can be developed. However, because  
6 the study was based on a pilot period of one online consultation system; the issues highlighted may  
7 be a result of the system studied, rather than all online consultation systems. Patient surveys were  
8 only sent to patients who had submitted an e-consultation (of which 10% responded), thus  
9 representing a self-selecting sample of those who had invested time into the system. Surveys were  
10 sent to patients seven days after they had submitted an e-consultation, which may have been before  
11 their e-consultations had been processed with 14% of patients waiting to hear back. Because e-  
12 consultation usage was low,<sup>30</sup> those patients using the system may be unrepresentative of the wider  
13 patient population.  
14  
15  
16  
17  
18  
19  
20

## 21 CONCLUSIONS

22  
23 E-consultations can increase patient access and satisfaction, but in their current form, were not  
24 perceived as creating sufficient workload efficiencies for continued practice usage. Patients' use of e-  
25 consultations impacted upon staff's appraisal of the system. Where both patients and staff interact  
26 with healthcare technology, it is in effect 'co-implemented'. Extending NPT through service co-  
27 production theory and touchpoints enables an analytic focus on service processes and interactions  
28 between staff and patients, and how the e-consultation system affected these. Mapping the co-  
29 production of an e-consultation through touchpoints<sup>35 37</sup> has highlighted where the system may be  
30 redesigned or implementation improved. This analysis can support more effective implementation  
31 of appropriate technology that accounts for professional and patient experiences.  
32  
33  
34  
35  
36  
37

## 38 FOOTNOTES

### 39 Acknowledgements

40  
41 Authors thank staff from participating practices for assisting with the collection of individual-level  
42 data, and the software developers for providing web usage statistics and anonymous patient survey  
43 data.  
44  
45

### 46 Funding

47  
48 This research is funded by the One Care Consortium Ltd and the National Institute for Health  
49 Research (NIHR) Collaboration for Leadership in Applied Health Research and Care West at  
50 University Hospitals Bristol NHS Foundation Trust. The One Care Consortium facilitated data  
51 collection. The views expressed are those of the authors and not necessarily those of the NHS, the  
52 NIHR or the Department of Health.  
53  
54  
55  
56  
57  
58  
59  
60



### Competing interests

None declared.

### Ethical approval

The study was reviewed by the NHS Health Research Authority (project ID: 204925) and ethically reviewed by the University of Bristol, Faculty of Health Sciences, Research Ethics Committee (Application 32961).

### Contributors

KN, JH, HE, MF, JB, and EB were responsible for the study design and collection of data. KN, JH and EB were responsible for study management and co-ordination. CS was a project advisor throughout. MF, JB, HE and KN analysed the data. MF drafted the paper. All authors read, commented on and approved the final manuscript.

### Data sharing statement

The datasets analysed during the current study are not publicly available, as participants were not asked to consent to this at the time of data collection. Related patient survey results are available in the Supplementary file.

### Supplementary file

Table A: Patient survey – how and why accessed e-consultations, and resulting satisfaction

Table B: E-consultation patient survey free text response numbers

## REFERENCES

1. Hobbs FDR, Bankhead C, Mukhtar T, et al. Clinical workload in UK primary care: a retrospective analysis of 100 million consultations in England, 2007-2014. *Lancet* 2016;387(10035):2323-30. doi: 10.1016/S0140-6736(16)00620-6
2. BMA. National survey of GPs: the future of general practice. London: British Medical Association 2015.
3. Kaffash J. Average waiting time for GP appointment increases 30% in a year 2016 [updated 10 June 2016]. Available from: <http://www.pulsetoday.co.uk/your-practice/access/average-waiting-time-for-gp-appointment-increases-30-in-a-year/20032025.article>.
4. Atherton H, Ziebland S. What do we need to consider when planning, implementing and researching the use of alternatives to face-to-face consultations in primary healthcare? *Digit Health* 2016;2:2055207616675559. doi: doi:10.1177/2055207616675559
5. NHEngland. GP Access Fund: NHS England; 2013 [Accessed 17/01/2017]. Available from: <https://www.england.nhs.uk/gp/gp/vf/redesign/improving-access/gp-access-fund/> accessed 17 Jan 2017.
6. NHEngland. General Practice Forward View. NHS England, 2016.
7. NHEngland. Online Consultation Systems: NHS England; 2016 [Available from: <https://www.england.nhs.uk/gp/gp/vf/redesign/gpdp/consultation-systems/> accessed 10 Feb 2017.

- 1
- 2
- 3 8. Hanna L, May C, Fairhurst K. Non-face-to-face consultations and communications in primary care:  
4 the role and perspective of general practice managers in Scotland. *Informatics in primary*  
5 *care* 2011;19(1):17-24.
- 6 9. Hanna L, May C, Fairhurst K. The place of information and communication technology-mediated  
7 consultations in primary care: GPs' perspectives. *Family practice* 2012;29(3):361-6. doi:  
8 10.1093/fampra/cm087 [published Online First: 2011/10/19]
- 9 10. Brant H, Atherton H, Ziebland S, et al. Using alternatives to face-to-face consultations: a survey of  
10 prevalence and attitudes in general practice. *The British journal of general practice : the*  
11 *journal of the Royal College of General Practitioners* 2016 doi: 10.3399/bjgp16X685597
- 12 11. The One Care Consortium [Accessed 17/01/2017]. Available from:  
13 <http://onecareconsortium.co.uk/about/pmcf-programme/> accessed 17 Jan 2017.
- 14 12. EMISHealth. eConsult: A platform that enables patients to self-manage and consult online: Emis  
15 Health; 2016 [Accessed 30/06/2016]. Available from:  
16 <https://www.emishealth.com/products/econsult/> accessed 30 Jun 2016
- 17 13. Maddan A. webGP: the virtual general practice. Pilot report. London: Hurley Group, 2014.
- 18 14. May C, Finch T. Implementing, Embedding, and Integrating Practices: An Outline of  
19 Normalization Process Theory. *Sociology* 2009;43(3):535-54. doi:  
20 10.1177/0038038509103208
- 21 15. Murray E, Treweek S, Pope C, et al. Normalisation process theory: a framework for developing,  
22 evaluating and implementing complex interventions. *BMC Med* 2010;8(1):1-11. doi:  
23 10.1186/1741-7015-8-63
- 24 16. May C, Rapley T, Mair FS, et al. Normalization Process Theory On-line Users' Manual, Toolkit and  
25 NoMAD instrument. 2015 [Available from: <http://www.normalizationprocess.org>.
- 26 17. Ross J, Stevenson F, Lau R, et al. Factors that influence the implementation of e-health: a  
27 systematic review of systematic reviews (an update). *Implement Sci* 2016;11(1):146. doi:  
28 10.1186/s13012-016-0510-7
- 29 18. Gibson J, Lightbody E, McLoughlin A, et al. 'It was like he was in the room with us': patients' and  
30 carers' perspectives of telemedicine in acute stroke. *Health Expect* 2016;19(1):98-111. doi:  
31 10.1111/hex.12333
- 32 19. Kennedy A, Vassilev I, James E, et al. Implementing a social network intervention designed to  
33 enhance and diversify support for people with long-term conditions. A qualitative study.  
34 *Implement Sci* 2016;11(1):1-15. doi: 10.1186/s13012-016-0384-8
- 35 20. Clarke DJ, Godfrey M, Hawkins R, et al. Implementing a training intervention to support  
36 caregivers after stroke: a process evaluation examining the initiation and embedding of  
37 programme change. *Implement Sci* 2013;8(1):96. doi: 10.1186/1748-5908-8-96
- 38 21. Connell LA, McMahan NE, Harris JE, et al. A formative evaluation of the implementation of an  
39 upper limb stroke rehabilitation intervention in clinical practice: a qualitative interview  
40 study. *Implement Sci* 2014;9(1):1-12. doi: 10.1186/s13012-014-0090-3
- 41 22. Brandsen T, Honingh M. Distinguishing Different Types of Coproduction: A Conceptual Analysis  
42 Based on the Classical Definitions. *Publ Admin Rev* 2016;76(3):427-35. doi:  
43 10.1111/puar.12465
- 44 23. Osborne SP, Radnor Z, Strokosch K. Co-Production and the Co-Creation of Value in Public  
45 Services: A suitable case for treatment? *Public Manag Rev* 2016;18(5):639-53. doi:  
46 10.1080/14719037.2015.1111927
- 47 24. Batalden M, Batalden P, Margolis P, et al. Coproduction of healthcare service. *BMJ Qual Saf* 2015  
48 doi: 10.1136/bmjqs-2015-004315
- 49 25. Radnor Z, Osborne SP, Kinder T, et al. Operationalizing Co-Production in Public Services Delivery:  
50 The contribution of service blueprinting. *Public Manag Rev* 2014;16(3):402-23. doi:  
51 10.1080/14719037.2013.848923
- 52 26. Alford J. Co-Production, Interdependence and Publicness: Extending public service-dominant  
53 logic. *Public Manag Rev* 2016;18(5):673-91. doi: 10.1080/14719037.2015.1111659
- 54
- 55
- 56
- 57
- 58
- 59
- 60

- 1  
2  
3 27. Ordanini A, Pasini P. Service co-production and value co-creation: The case for a service-oriented  
4 architecture (SOA). *EMJ* 2008;26(5):289-97. doi:  
5 <http://dx.doi.org/10.1016/j.emj.2008.04.005>
- 6 28. Osborne SP, Radnor Z, Nasi G. A New Theory for Public Service Management? Toward a (Public)  
7 Service-Dominant Approach. *ARPA* 2013;43(2):135-58. doi: 10.1177/0275074012466935
- 8 29. Osborne SP, Strokosch K. It takes Two to Tango? Understanding the Co-production of Public  
9 Services by Integrating the Services Management and Public Administration Perspectives.  
10 *British Journal of Management* 2013;24:S31-S47. doi: 10.1111/1467-8551.12010
- 11 30. Edwards H, Marques E, Hollingworth W, et al. Use of a primary care online consultation system,  
12 by whom, when and why: evaluation of a pilot observational study in 36 general practices in  
13 South West England. *BMJ Open* 2017;7:e016901 doi: 10.1136/bmjopen-2017-016901
- 14 31. Banks J, Farr M, Salisbury C, et al. The use of an electronic consultation system in primary care:  
15 views and experiences from general practice. *Br J Gen Pract.* 2017 doi:  
16 10.3399/bjgp17X693509
- 17 32. PublicHealthEngland. National General Practice Profiles 2017 [Available from:  
18 <https://fingertips.phe.org.uk/profile/general-practice/data> accessed 22 Nov 2017.
- 19 33. Braun V, Clarke V. Using thematic analysis in psychology. *Qualitative Research in Psychology*  
20 2006;3:77-101.
- 21 34. Parasuraman A, Zeithaml VA, Berry LL. A Conceptual Model of Service Quality and Its  
22 Implications for Future Research. *J Mark* 1985;49(4):41-50. doi: 10.2307/1251430
- 23 35. Parker S, Heapy J. The Journey to the Interface: How public service design can connect users to  
24 reform. London: Demos, 2006.
- 25 36. Moran-Ellis J, Alexander VD, Cronin A, et al. Triangulation and integration: processes, claims and  
26 implications. *Qualitative Research* 2006;6(1):45-59. doi: 10.1177/1468794106058870
- 27 37. Bitner MJ, Ostrom AL, Morgan FN. Service Blueprinting: A practical technique for service  
28 innovation. *Calif Manage Rev* 2008;50(3):66-94.
- 29 38. Bate P, Robert G. Bringing user experience to healthcare improvement: the concepts, methods  
30 and practices of experience-based design. Oxford: Radcliffe Publishing 2007.
- 31 39. Boaz A, Robert G, Locock L, et al. What patients do and their impact on implementation. *J Health*  
32 *Organ Manag* 2016;30(2):258-78. doi: 10.1108/jhom-02-2015-0027 [published Online First:  
33 2016/04/08]
- 34 40. Wherton J, Sugarhood P, Procter R, et al. Co-production in practice: how people with assisted  
35 living needs can help design and evolve technologies and services. *Implement Sci*  
36 2015;10:75. doi: 10.1186/s13012-015-0271-8
- 37 41. Ellender M. E-consultations can work in the NHS - it's a learning curve. Response to: Electronic  
38 consultations offer few benefits for GP practices, says study. *BMJ* 2017;359 doi:  
39 10.1136/bmj.j5141
- 40 42. Jiwa M, Meng X. Video Consultation Use by Australian General Practitioners: Video Vignette  
41 Study. *Journal of medical Internet research* 2013;15(6):e117. doi: 10.2196/jmir.2638
- 42 43. Holt TA, Fletcher E, Warren F, et al. Telephone triage systems in UK general practice: analysis of  
43 consultation duration during the index day in a pragmatic randomised controlled trial. *The*  
44 *British journal of general practice : the journal of the Royal College of General Practitioners*  
45 2016;66(644):e214-e18. doi: 10.3399/bjgp16X684001
- 46 44. Mair FS, May C, O'Donnell C, et al. Factors that promote or inhibit the implementation of e-  
47 health systems: an explanatory systematic review. *Bulletin of the World Health Organization*  
48 2012;90(5):357-64. doi: 10.2471/blt.11.099424 [published Online First: 2012/05/17]
- 49 45. Murray E, Burns J, May C, et al. Why is it difficult to implement e-health initiatives? A qualitative  
50 study. *Implementation Science* 2011;6(1):1-11. doi: 10.1186/1748-5908-6-6
- 51 46. May CR, Finch TL, Cornford J, et al. Integrating telecare for chronic disease management in the  
52 community: What needs to be done? *BMC Health Serv Res* 2011;11(1):131. doi:  
53 10.1186/1472-6963-11-131
- 54  
55  
56  
57  
58  
59  
60

- 1  
2  
3 47. Greenhalgh T, Wherton J, Papoutsis C, et al. Beyond Adoption: A New Framework for Theorizing  
4 and Evaluating Nonadoption, Abandonment, and Challenges to the Scale-Up, Spread, and  
5 Sustainability of Health and Care Technologies. *Journal of medical Internet research*  
6 2017;19(11):e367. doi: 10.2196/jmir.8775  
7 48. Greenhalgh T, Procter R, Wherton J, et al. The organising vision for telehealth and telecare:  
8 discourse analysis. *BMJ Open* 2012;2(4) doi: 10.1136/bmjopen-2012-001574  
9 49. Stokes-Lampard H, Stodel M, Bullard E, et al. GP Forward View: Assessment of progress Year 1.  
10 London: Royal College of General Practitioners, 2017.  
11 50. NHEngland. New consultation types - eConsult in Southampton NHEngland; 2017 [Available  
12 from: [https://www.england.nhs.uk/publication/10-high-impact-actions-new-types-of-](https://www.england.nhs.uk/publication/10-high-impact-actions-new-types-of-consultation-econsult-in-southampton/)  
13 [consultation-econsult-in-southampton/](https://www.england.nhs.uk/publication/10-high-impact-actions-new-types-of-consultation-econsult-in-southampton/) accessed 10 Nov 2017.  
14 51. Varnam R. Online consultations at Unity Health, York: NHS Networks; 2017 [Available from:  
15 [https://www.networks.nhs.uk/nhs-networks/releasing-capacity-in-general-](https://www.networks.nhs.uk/nhs-networks/releasing-capacity-in-general-practice/messageboard/2-new-consultation-types/128512817)  
16 [practice/messageboard/2-new-consultation-types/128512817](https://www.networks.nhs.uk/nhs-networks/releasing-capacity-in-general-practice/messageboard/2-new-consultation-types/128512817) accessed 10 Nov 2017.  
17  
18

19 **Figure 1: NPT constructs in association with the implementation of e-consultations**

20 **Figure 2: Combining NPT framework with service co-production processes**

21 **Figure 3: E-consultation process map highlighting key touchpoints**

22  
23  
24  
25  
26  
27  
28  
29  
30  
31  
32  
33  
34  
35  
36  
37  
38  
39  
40  
41  
42  
43  
44  
45  
46  
47  
48  
49  
50  
51  
52  
53  
54  
55  
56  
57  
58  
59  
60

| NPT Construct                  |                                                                                                                                                     |
|--------------------------------|-----------------------------------------------------------------------------------------------------------------------------------------------------|
| <b>Coherence</b>               | Sense-making work to understand the possibilities of an intervention.<br><i>What are the purposes of e-consultations?</i>                           |
| <b>Cognitive participation</b> | Relational work that builds a community of practice around an intervention.<br><i>What promotes participation with e-consultations?</i>             |
| <b>Collective action</b>       | Operational work that people enact to make an intervention function.<br><i>How do participants interact with e-consultations to make them work?</i> |
| <b>Reflexive monitoring</b>    | Appraisal work where people assess how a new practice affects them and others.<br><i>How do participants appraise e-consultations?</i>              |

Figure 1: NPT constructs in association with the implementation of e-consultations

148x64mm (300 x 300 DPI)

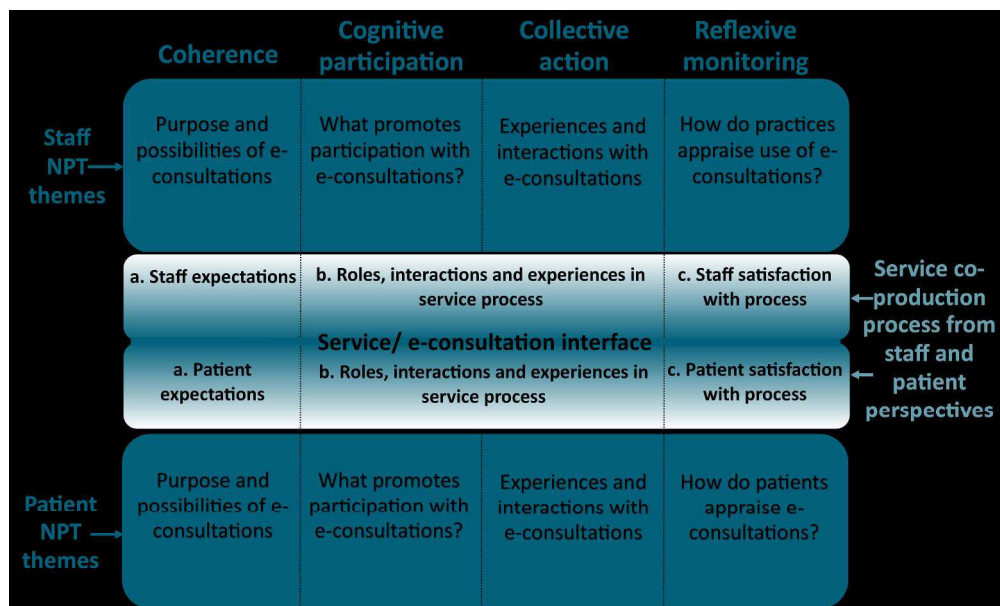

Figure 2: Combining NPT framework with service co-production processes

285x171mm (300 x 300 DPI)

Review only

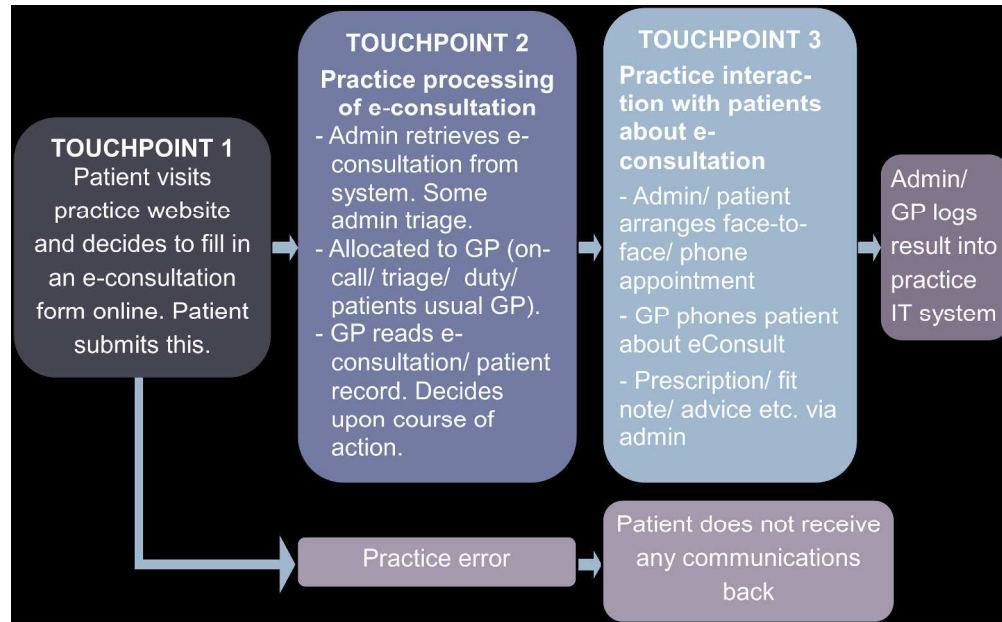

Figure 3: E-consultation process map highlighting key touchpoints

286x177mm (300 x 300 DPI)



## SUPPLEMENTARY FILE

**Table A: Patient survey – how and why accessed e-consultations, and resulting satisfaction**

Some of these questions are expanded further with free-text responses, overviewed in Table B.

|                                                                                                                                 | <b>% (n)</b> |
|---------------------------------------------------------------------------------------------------------------------------------|--------------|
| How did you hear about the Consult Online from Home Service?                                                                    |              |
| My GP told me about it                                                                                                          | 0.3% (2)     |
| Someone else from the GP practice                                                                                               | 4.2% (33)    |
| From the GP practice website                                                                                                    | 58.0% (455)  |
| Another patient/family member                                                                                                   | 4.2% (33)    |
| From an internet search                                                                                                         | 5.6% (44)    |
| I read about it                                                                                                                 | 2.7% (21)    |
| From a leaflet or promotional banner                                                                                            | 18.5% (145)  |
| Other → Free text                                                                                                               | 6.6% (52)    |
| When your practice contacted you about your Consult Online From Home Service assessment, what were you advised to do?           |              |
| How to look after the problem myself, without contacting the GP practice/other health service                                   | 9.1% (56)    |
| Pick up a prescription from the surgery /pharmacy                                                                               | 27.6% (169)  |
| Visit the GP practice for face-to-face at later date                                                                            | 40.0% (244)  |
| Go to A&E department / Walk-in Centre etc                                                                                       | 1.5% (9)     |
| Was not contacted                                                                                                               | 13.7% (84)   |
| Other → Free text                                                                                                               | 8.3% (51)    |
| How likely are you to recommend the Consult Online From Home Service to friends and family if they need similar care or advice? |              |
| Extremely likely                                                                                                                | 55.5% (422)  |
| Likely                                                                                                                          | 25.2% (192)  |
| Neither likely nor unlikely                                                                                                     | 7.2% (55)    |
| Unlikely                                                                                                                        | 6.6% (50)    |
| Extremely unlikely                                                                                                              | 5.5% (42)    |
| Would you use the service again instead of booking a face to face appointment?                                                  |              |
| Yes                                                                                                                             | 76.3% (582)  |
| No                                                                                                                              | 8.5% (65)    |
| Not sure                                                                                                                        | 15.2% (116)  |
| Thinking about your use of the Consult Online From Home Service, would you agree or disagree with the statements below          |              |
| The Consult Online From Home Service was easy to use.                                                                           |              |
| Strongly agree                                                                                                                  | 50.7% (383)  |
| Agree                                                                                                                           | 37.6% (284)  |
| Neither agree nor disagree                                                                                                      | 5.2% (39)    |
| Disagree                                                                                                                        | 5.2% (39)    |
| Strongly disagree                                                                                                               | 1.5% (11)    |



|                                                                                                                             | % (n)       |
|-----------------------------------------------------------------------------------------------------------------------------|-------------|
| Overall, how satisfied or dissatisfied were you with using the Consult Online From Home Service for your health assessment? |             |
| Very satisfied                                                                                                              | 60.3% (459) |
| Fairly satisfied                                                                                                            | 20.4% (155) |
| Neither satisfied nor dissatisfied                                                                                          | 4.3% (33)   |
| Fairly dissatisfied                                                                                                         | 7.4% (56)   |
| Very dissatisfied                                                                                                           | 7.6% (58)   |

**Table B: E-consultation patient survey free text response numbers**

Table B summarises the free text questions from the eConsult online patient satisfaction survey, with response numbers. Average word counts of comments, alongside the range of comments from the lowest number of words in a comment to the highest are provided to give details on the breadth and depth of comments

| <b>E-consultation survey question</b>                                                                                             | <b>Number of free text responses</b> | <b>Average word count of comments</b> | <b>Word count range of comments</b> |
|-----------------------------------------------------------------------------------------------------------------------------------|--------------------------------------|---------------------------------------|-------------------------------------|
| How did you hear about the Consult Online?                                                                                        | 49                                   | 6.3                                   | 2 to 18                             |
| If the Consult Online service had not been available, what would you have done about your health problem?                         | 37                                   | 11.4                                  | 1 to 67                             |
| Was there a practical reason why you used the Consult Online?                                                                     | 182                                  | 12.9                                  | 1 to 68                             |
| When your practice contacted you about your Consult Online assessment, what were you advised to do?                               | 224                                  | 10.8                                  | 1 to 93                             |
| Did you follow the Consult Online advice? (if answered no, reason why they did not follow advice)                                 | 74                                   | 8.6                                   | 1 to 27                             |
| Did any of our staff make your experience particularly good?                                                                      | 343                                  | 16.7                                  | 1 to 187                            |
| Overall, how satisfied or dissatisfied were you with using the Consult Online Service for your health assessment? Reason for this | 510                                  | 28.1                                  | 1 to 257                            |
| What improvements would you make to the service?                                                                                  | 512                                  | 16.3                                  | 1 to 127                            |

**COREQ Statement****Implementing online consultations in primary care: A mixed method evaluation extending normalisation process theory through service co-production****Domain 1: Research team and reflexivity***Personal Characteristics***1. Interviewer/facilitator. Which author/s conducted the interview or focus group?**

Jon Banks (JB)

Michelle Farr (MF)

(Included as authors, p.1, Title page)

**2. Credentials. What were the researcher's credentials? E.g. PhD, MD.**

JB: BA (WEngland), PhD (Wales), PGdip (Wales)

MF: BSc (Hons), MPhil, PhD, FHEA

(page number not applicable)

**3. Occupation. What was their occupation at the time of the study?**

JB: Research Fellow: Applied Social Science (Qualitative), National Institute for Health Research, Collaborations for Leadership in Applied Health Research and Care West (NIHR CLAHRC West), University of Bristol

MF: Senior Research Associate in Applied Social Science (Qualitative) Research, National Institute for Health Research, Collaborations for Leadership in Applied Health Research and Care West (NIHR CLAHRC West) (institutional affiliations given, p.1)

**4. Gender. Was the researcher male or female?**

JB: Male

MF: Female.

(page number not applicable)

**5. Experience and training. What experience or training did the researcher have?**

JB: Post graduate diploma in social science research methods as part of PhD, experience of collecting and analysing qualitative data with 15 years as a research associate and research fellow.

MF: Extensive training in qualitative research methods (MPhil, PhD), taught qualitative research methods to undergraduates. 12 years' experience conducting qualitative research.

(page number not applicable)

*Relationship with participants***6. Relationship established. Was a relationship established prior to study commencement?**

No relationship was established before the commencement of study (p.5 gives details of how practices and participants were sampled).

**7. Participant knowledge of the interviewer. What did the participants know about the researcher? e.g. personal goals, reasons for doing the research?**

The professional goals of the researchers were to complete the aims and objectives of the study only. The researchers had no personal goals or reasons for doing the research. As part of recruitment and gaining informed consent clinicians were fully informed about the aims and objectives of the study through participant information sheets (p.5).

1 **8. Interviewer characteristics. What characteristics were reported about the interviewer/facilitator? e.g. Bias, assumptions, reasons and interests in the research topic.**

2 The interviewers (JB and MF) were both social scientists.

3 All participants were aware that the interviews were for independent academic research through participant information sheets (p.5).

4 The researchers had no personal interests in the study, it was solely their professional role.

5  
6  
7  
8  
9 **Domain 2: study design**

10 *Theoretical framework*

11 **9. Methodological orientation and Theory. What methodological orientation was stated to underpin the study? e.g. grounded theory, discourse analysis, ethnography, phenomenology, content analysis**

12 In the Background section we explain how we use normalisation process theory and service co-production theory to understand how both patients and staff co-implement and use technology (p.4).

13 In the Methods section we explain how NPT and co-production theory were used to integrate staff and patient perspectives on e-consultations (p.7 Heading: Using NPT and co-production to integrate patient and staff perspectives).

14  
15  
16  
17  
18  
19  
20  
21 *Participant selection*

22 **10. Sampling. How were participants selected? e.g. purposive, convenience, consecutive, snowball.**

23 GP practices were purposively sampled to ensure a range of: locations (rural/suburban/urban); practice levels of deprivation measured by the Index of Multiple Deprivation (IMD) from practice postcodes; and volume of e-consultation usage (calculated by dividing the number of e-consultations received by the number of days the system was live at time of sampling). Six practices were purposively sampled to conduct qualitative interviews. A purposive sample of staff with different professional roles from these six practices involved in the processing or managing of e-consultations were invited to be interviewed via email, with contacts and invitations facilitated by practice managers. Please see Methods section Sampling and Recruitment (p.5) and Table 2.

24  
25  
26  
27  
28  
29  
30  
31  
32  
33 **11. Method of approach. How were participants approached? e.g. face-to-face, telephone, mail, email**

34 Six practices were sampled to be invited to take part in the qualitative research, with six replacements with a similar profile if any of the first six did not want to participate. Practices were initially approached and invited to take part in the research by OneCare staff who were the study collaborators and, as a GP consortium, had direct contact with the practices. OneCare staff phoned practices and emailed them a letter to explain about the research and what getting involved would mean in terms of time and resources. If practices were interested in taking part and wanted to be contacted by the researchers, OneCare staff gave the researchers the practice managers email and telephone number to arrange a discussion about getting involved in the research. Once practice managers had agreed to take part in the research they identified who may be appropriate staff to be interviewed, focusing on those who were involved in the e-consultation system. Practice managers initially approached GPs and administrative staff to ask if they were interested in participating in research interviews. All interviewees were given participant information sheets either via the practice manager, and/ or by researchers. Interviews were organised with different staff via the practice manager. Before interviews commenced, researchers went through the participant information sheet with participants, with further opportunities to ask questions about the research. See Heading: Sampling and recruitment (p.5).

35  
36  
37  
38  
39  
40  
41  
42  
43  
44  
45  
46  
47  
48  
49  
50  
51  
52  
53  
54  
55 **12. Sample size. How many participants were in the study?**

56 We interviewed 23 practice staff. Please see Table 2: Sampled GP practice and interview participant profiles (p.5-6).

**13. Non-participation. How many people refused to participate or dropped out? Reasons**

Two practices did not want to take part, so we invited those reserve practices that had a similar profile to the ones who did not want to take part. Both two reserve practices agreed to take part. Because practice managers spoke to practice staff initially about taking part in interviews (p.5) we do not know how many practice staff declined to take part in an interview, as we only spoke to those who were willing to take part.

*Setting***14. Setting of data collection. Where was the data collected? e.g. home, clinic, workplace**

Interviews took place both face to face within general practice offices (n=20) and over the phone (n=3) (p.6).

**15. Presence of non-participants. Was anyone else present besides the participants and researchers?**

Most interviews took place in private offices, with just the interviewee. However, two of the practice manager interviews and two of the interviews with administrative staff were held in shared office spaces but as this was about work based processes we do not believe that this inhibited the interviews in any way (page number not applicable).

**16. Description of sample. What are the important characteristics of the sample? e.g. demographic data, date.**

Interviews were conducted with 23 practice staff including: 10 GPs, 1 nurse practitioner (NP) (this interviewee is designated with (GP) notation to avoid potential identification), 6 practice managers (PM), 6 'administrators' including an IT manager and receptionists (AD). Please see Table 2: Sampled GP practice and interview participant profiles and Heading: Qualitative interviews and analysis (p.5-6).

*Data collection***17. Interview guide. Were questions, prompts, guides provided by the authors? Was it pilot tested?**

A semi-structured, topic guide was used for all interviews, guided by NPT. This was discussed and agreed with OneCare staff, the research partners (Heading: Qualitative interviews and analysis, p.6).

**18. Repeat interviews.**

We did not conduct repeat interviews (p.5-6 gives the list of interviews and interviewees).

**19. Audio/visual recording. Did the research use audio or visual recording to collect the data?**

Yes audio recording was used through interview data collection, with full informed consent (Heading: Qualitative interviews and analysis, p.6).

**20. Field notes. Were field notes made during and/or after the interview or focus group?**

Yes, some summary notes were made in addition to the voice recorded interviews (page number not applicable).

**21. Duration. What was the duration of the interviews or focus group?**

Interviews lasted between 10-40 minutes (Heading: Qualitative interviews and analysis, p.6).

**22. Data saturation. Was data saturation discussed?**

Data saturation was discussed in research management meetings. Data collection and analysis was conducted in parallel, with participants sampled until data saturation was reached (Heading: Qualitative interviews and analysis, p.6).

1 **23. Transcripts returned. Were transcripts returned to participants for comment and/or**  
2 **correction?**

3 No. We did not feel this was possible to offer in the time available in the study (page number not applicable).  
4

5 **Domain 3: analysis and findings**

6 *Data analysis*

7 **24. Number of data coders. How many data coders coded the data?**

8 Analysis was conducted by two researchers (MF and JB) with a subset double coded to ensure rigour. Key  
9 themes were discussed within the research team to enhance credibility and external validity (Heading:  
10 Qualitative interviews and analysis, p.6).  
11  
12

13 **25. Description of the coding tree. Did authors provide a description of the coding tree?**

14 The coding tree is not included in the manuscript due to word limits (page number not applicable).  
15  
16

17 **26. Derivation of themes. Were themes identified in advance or derived from the data?**

18 Themes were derived inductively from the data. These were then ordered using NPT as a framework (Heading:  
19 Qualitative interviews and analysis, p.6 and Heading: Using NPT and co-production to integrate patient and  
20 staff perspectives, p.7).  
21  
22

23 **27. Software. What software, if applicable, was used to manage the data?**

24 We used NVivo 10 qualitative software package to manage the data (Heading: Qualitative interviews and  
25 analysis, p.6).  
26  
27

28 **28. Participant checking. Did participants provide feedback on the findings?**

29 Participants did not provide feedback on the initial findings. However emerging research themes were  
30 discussed in research management meetings with OneCare, as research collaborators (page number not  
31 applicable).  
32  
33

34 **29. Quotations presented. Were participant quotations presented to illustrate the themes /**  
35 **findings? Was each quotation identified? e.g. participant number**

36 Yes unique participant codes are used alongside quotes, to illustrate findings. The professional roles of the  
37 interviewees were identified within the codes. (Heading: Results, p.8-14)  
38  
39

40 **30. Data and findings consistent. Was there consistency between the data presented and the**  
41 **findings?**

42 Yes (Heading: Results, p.8-14)  
43  
44

45 **31. Clarity of major themes. Were major themes clearly presented in the findings?**

46 Yes (Heading: Results, p.8-14)  
47  
48

49 **32. Clarity of minor themes. Is there a description of diverse cases or discussion of minor**  
50 **themes?**

51 Yes a range of practitioner perspectives are included (Heading: Results, p.8-14). For example, one clinician  
52 who had substantial experience of conducting phone triage, reported that they dealt with most e-  
53 consultations without needing to see patients face-to-face, unless it was for new acute symptoms/ diagnosis.  
54 This potentially suggests that GPs may get more used to this consultation approach over time (p.10).  
55  
56  
57  
58  
59  
60
